# Supplementary material
Source: HighWire-hosted journal article supplement (doi:10.1101/rna.079025.121)
Supplement: Supplemental_Figure_Table_Legends.docx [file Supplemental_Figure_Table_Legends.docx]

Supplemental Figure Legends

**Figure S1. The formation of the neck region of the SSU.** (A) rRNA from yeast pre-40S (PDB 6FAI) (Scaiola et al. 2018) denoting the positions of the head, neck, and body region. Inset: a close-up view of the neck region composed of helices 28 (magenta), 35-37 (green), and the central pseudoknot (CPK; helices 1 & 2; blue). Other rRNA is colored in light gray, and the position of the target base of Bud23, G1575, is shown in orange spheres. (B) The Rps0-cluster proteins, containing Rps0 (marine blue), Rps21 (yellow), and Rps2 (ruby), from PDB 6FAI are shown in complex with the neck region as colored in panel A. (C) The maturation of the neck region and relevant biogenesis factors as shown by structures of human pre-40S intermediates (Ameismeier et al. 2018). In State A (PDB 6G4W), Bud23 (marine blue) and Trm112 (orange) are in complex with the P-site and are positioned above helix 28 while h37 contacts Rrp12 (brown). In state B (PDB 6G4S), h37 has repositioned roughly 79 Å from its position in State A and the Rps0-cluster proteins and helices 35 and 36 are resolved while Bud23 and Trm112 become unresolved. In State C (PDB 6G18), Rrp12 becomes unresolved while Rio2 (cyan) becomes resolved at the P-site. The Rps0-cluster proteins and the rRNA are colored as in panels A and B. ﻿Molecular visualizations were generated in MacPyMOL: PyMOL v1.8.2.1 Enhanced for Mac OS X (Schrödinger LLC).

**Figure S2. Ectopic *RPS2* suppresses the growth defect of *bud23*∆.** (A) Ectopic expression of *RPS2* from 2µ or CEN vectors suppressed the growth defect of *bud23*∆ as shown by 10-fold serial dilutions of *bud23*∆ (AJY2676) cells transformed with an empty vector (pRS416) or a vector encoding *BUD23* (pAJ2925) or 2µ vectors encoding *RPS2* (pAJ2149, pAJ1652, and pAJ1653) or a CEN vector encoding *RPS2* spotted on SD Ura- media and grown for 2 days at 30°C. (B) A schematic indicating the genomic regions contained in the two plasmids (pAJ1652 and pAJ1653) that were isolated in the screen for high-copy suppressors of the growth defect of *bud23*∆. These regions encompass the full coding regions for *RPS2,* *NAB2,* and *GPG1*, and partial regions for *MON1* and *PRP43* expected to render the latter two genes non-functional. (C) Ectopic expression of *RPS2* partially restored 40S biogenesis as shown by the UV traces (A254nm) of polysome profiles after extracts made form CHX-treated *bud23*∆ (AJY2676) cells containing an empty vector (pRS315) or a vector encoding *BUD23* (pAJ2154) or *RPS2* (pAJ2960) were sedimented through sucrose density gradients. (D) Ectopic expression of TSR4 from a 2µ vector enhanced the *bud23*∆ suppression phenotype of ectopic *RPS2* as shown by 10-fold serial dilutions of *bud23*∆ (AJY2676) cells transformed with the following pairwise combination of vectors: *BUD23*/empty (pAJ2924/pRS416), empty/empty (pRS315/pRS416), *RPS2*/empty (pAJ2960/pRS416), *RPS2*/*TSR4* *CEN* (pAJ2960/pAJ4183), *RPS2*/*TSR4* *2µ* (pAJ2960/pAJ4184), empty/*TSR4* *CEN* (pRS315/pAJ4183), empty/*TSR4* *2µ* (pRS315/pAJ4184). Cells were spotted on SD Leu-Ura- media and grown for 2 days at 30°C.

**Figure S3. Ectopic *RPS21* and *RPS0* do not suppress the growth defect *bud23*∆ cells.** Ectopic expression of *RPS21A* and *RPS0B* individually did not suppress the growth defect of *bud23*∆ nor did co-expression of *RPS2*, *RPS21A*, and *RPS0B* increase the extent of suppression by expression of *RPS2* alone. 10-fold serial dilutions of wild-type (BY4741) cells transformed with an empty vector (pRS415) and *bud23*∆ (AJY2676) cells transformed with an empty vector (pAJ5103) or a vector encoding *RPS2* (pAJ4654), *RPS21A* (pAJ4672), *RPS0B* (pAJ4673), or all three genes (pAJ4674) spotted on SD Leu- media and grown for 2 days at 30°C.

**Figure S4. Depletion of the Rps0-cluster proteins causes Rrp12 to accumulate on 40S precursors.** The depletion Rps0, Rps2, and Rps21 each caused similar levels of Rrp12 to accumulate on Enp1-FTP particles but differing levels of Bud23 as shown by Western blotting for specific factors that co-purified with Enp1-FTP-associated pre-ribosomal particles in the presence (WT) or absence of Rps0 (Rps0-), Rps2 (Rps2-), or Rps21 (Rps21-). Strains AJY4781 (WT), AJY4705 (Rps0-), AJY4706 (Rps2-), AJY4707 (Rps21-), and BY4741 (No tag) were cultured in YPGal to early exponential phase then treated with 2% glucose for 2 hours to transcriptionally repress the RP genes.

**Figure S5. Tsr4, the chaperone of Rps2, is needed for Bud23 release from pre-40S.** (A) A schematic of the genomic *TSR4* fused to auxin-inducible degron system in which the gene encoding the exogenous E3 ligase, OsTir1, was placed under PGAL1 promoter that can be induced by a chimeric a β-estradiol-sensitive transcription factor containing the GAL4 DNA binding domain (VP16-ER-GAL4BD). (B) The growth phenotypes of the wild-type (AJY4724) or *TSR4-AID* (AJY4735) strains as shown by 10-fold serial dilutions of cells on YPD media with or without 0.5mM auxin and 1µM β-estradiol. (C) Western blot of time-course of the depletion of Tsr4-AID-HA using equivalent amounts of total protein from AJY4735 cells cultured to exponential phase then collected prior to or after the addition of 0.5mM auxin and 1µM β-estradiol for the indicated time points. G6PDH was used as the loading control. The ratio of Tsr4-AID-HA signal to G6PDH signal for each time point relative to that of the untreated time point (-1) is shown below. (D) Bud23 accumulated in preribosomes purified from Tsr4-depleted cells as shown by Western blotting for specific factors on particles that co-purify with Enp1-FTP. Strains AJY4724 (Tsr4+) and AJY4735 (Tsr4-) were cultured in YPD to early exponential phase then treated with 0.5mM auxin and 1µM β-estradiol for 2 hours to deplete Tsr4-AID-HA.

**Figure S6. Nob1 and Ltv1 are not needed for Bud23 release from 40S precursors.** (A) The growth phenotypes of the wild-type (AJY4724), *LTV1-AID* (AJY4734), and *NOB1-AID* (AJY4743) strains as shown by 10-fold serial dilutions of cells on YPD media with or without 0.5mM auxin and 1µM β-estradiol. (B) Western blot of time-course of the depletion of Ltv1-AID-HA (upper) and Nob1-AID-HA (lower) using equivalent amounts of total protein from AJY4734 and AJY4743 cells, respectively, cultured to exponential phase then collected prior to or after the addition of 0.5mM auxin and 1µM β-estradiol for the indicated time points. G6PDH was used as the loading control. The ratio of the signal for the AID-HA-tagged protein to G6PDH signal for each time point relative to that of the untreated time point (-1) is shown below. (C & D) Bud23 accumulated on particles from Tsr4-depleted cells but not Ltv1-depleted (C) or Nob1-depleted (D) particles as shown by Western blotting for specific factors on preribosomes that co-purify with Enp1-FTP. Asterisks (*) denote Enp1-FTP signal that is detected by the anti-Ltv1 antibody due to the presence of the Protein A tag, and the octothorp (#) denotes residual Ltv1-AID-HA signal. For (C), strains AJY4724 (WT), AJY4735 (Tsr4-), and AJY473 (Ltv1-) were cultured in YPD to early exponential phase then treated with 0.5mM auxin and 1µM β-estradiol for 2 hours to deplete the AID-HA-tagged factors. For (D), strains AJY4724 (WT), AJY4735 (Tsr4-), and AJY4743 (Nob1-) were cultured in YPD to early exponential phase then treated with 0.5mM auxin and 1µM β-estradiol for 1.5 hours to deplete Nob1-AID-HA.

**Figure S7. *RPS2-FLAG* and *RPS21A-HA* are fully functional.** The growth phenotypes of genomic *rps2*∆ strains harboring a vector encoding either *RPS2* (AJY4718) or *RPS2-FLAG* (AJY4717) compared to the wild-type strain (BY4741) in (A) and the growth phenotypes of genomic *rps21a*∆/*rps21b*∆ strains harboring a vector encoding either *RPS21A* (AJY4731) or *RPS21A-HA* (AJY4732) compared to the wild-type strain (BY4741) in (B) as shown by 10-fold serial dilutions of cells grown on YPD media for two days at 30°C.

**Figure S8. Comparison of the Rps2- and Rio2-depleted particles.** Comparison of the log2 fold change values for pre-40S factors in Rps2-depleted particles from Figure 3D versus the average log2 fold change values for pre-40S factors in the Rio2-depleted particles from Figure 6E. The dashed lines indicate the cut-off (log2 fold change > 0.5 or < -0.5) that denotes an appreciable change in the abundance of a factor.

**Figure S9. Quantification of Bud23 release assays.** Quantification of the signal intensities of Bud23 (A) and recombinant Rio2-HA (B) present in the pellet (P) and supernatant (S) fractions of the *in vitro* Bud23 release assays are shown as percent of total signal intensities in each fraction. Data were quantified using Image Studio (Li-Cor Biosciences), processed in Microsoft Excel, and plotted in GraphPad Prism 9 for Mac iOS ([www.graphpad.com](http://www.graphpad.com)). Data represent the mean of two independent technical replicates, and error bars denote the standard deviation. “N/A” indicates samples for which quantification was not applicable.

**Figure S10. Bud23 does not co-purify with Rio2-TAP.** (A) Bud23 does not associate with pre-40S particles that co-purify with Rio2-TAP as shown by Western blotting for specific factors. Strains AJY2667 (Rps2+) and AJY4761 (Rps2-) were cultured in YPGal to early exponential phase then treated with 2% glucose for 2 hours to repress the transcription of *RPS2*. (B) Rio2 does not co-purify with either PTH-Bud23 nor Bud23-FTP as shown by Western blotting for specific proteins. Strains AJY4295 (PTH-Bud23) and AJY4719 (Bud23-FTP) were cultured to early exponential phase in YPD media.

**Supplemental Methods 1. Details of Strain Construction.**

**Supplemental File 1. Mass spectrometry data for Tsr1-TAP affinity purifications for Rps2-depletion.**

**Supplemental File 2. Mass spectrometry data for Tsr1-TAP affinity purifications for Rio2-depletion.**
