# Supplementary material
Source: HighWire-hosted journal article supplement (doi:10.1101/rna.079025.121)
Supplement: Supplemental_File_S1.xlsx [file Supplemental_File_S1.xlsx]

## Sheet: Rps2-Summary
Sub-complex	Protein	Molecular Weight	RPS2	PGAL-RPS2	Avg SpC	RPS2 PPMW	PGAL-RPS2 PPMW	RPS2 RSAB	PGAL-RPS2 RSAB	log2FC S2-/S2	Protein + Avg SpC
90S/pre-40S	Enp1	55 kDa	369	394	381.5	6.70909	7.16364	1.5535	1.69322	0.124246	Enp1 (382)
90S/pre-40S	Pno1	30 kDa	177	220	198.5	5.9	7.33333	1.36616	1.73333	0.343425	Pno1 (199)
90S/pre-40S	Dim1	36 kDa	229	263	246	6.36111	7.30556	1.47293	1.72677	0.229386	Dim1 (246)
90S/pre-40S	Rrp12	138 kDa	181	415	298	1.31159	3.00725	0.303702	0.710804	1.22679	Rrp12 (298)
pre-40S	Nob1	52 kDa	157	186	171.5	3.01923	3.57692	0.699109	0.845455	0.274209	Nob1 (172)
pre-40S	Slx9	24 kDa	39	75	57	1.625	3.125	0.376272	0.738636	0.973087	Slx9 (57)
90S/pre-40S	Bud23	31 kDa	14	29	21.5	0.451613	0.935484	0.104572	0.221114	1.0803	Bud23 (22)
90S/pre-40S	Trm112	15 kDa	9	15	12	0.6	1	0.138931	0.236364	0.766636	Trm112 (12)
pre-40S	Tsr1	91 kDa	393	385	389	4.31868	4.23077	1	1	0	Tsr1 (389)
pre-40S	Ltv1	53 kDa	290	321	305.5	5.4717	6.0566	1.26698	1.43156	0.176191	Ltv1 (306)
pre-40S	Hrr25	57 kDa	286	305	295.5	5.01754	5.35088	1.16182	1.26475	0.122465	Hrr25 (296)
pre-40S	Rio2	49 kDa	328	326	327	6.69388	6.65306	1.54998	1.57254	0.020847	Rio2 (327)
pre-40S	Rio1	56 kDa	49	61	55	0.875	1.08929	0.202608	0.257468	0.345698	Rio1 (55)
	All SSU Processome		11.3636	7.42424	9.39394			0.0408807	0.0275271	-0.773242	All SSU Processome (9)
	All 40S RPs		81.9737	82.3158	82.1447			0.993484	1.0242	0.00472055	All 40S RPs (82)
	All 60S-related		11.6154	12.0962	11.8558			0.114868	0.110915	-0.00553667	All 60S-related (12)
	All Others		10.0952	10.9905	10.5429			0.0436952	0.0470191	-0.220869	All Others (11)

## Sheet: MassSpecData
Sub-complex	Protein	Molecular Weight	RPS2	PGAL-RPS2	RPS2 PPMW	PGAL-RPS2 PPMW	RPS2 RSAB	PGAL-RPS2 RSAB	log2FC S2-/S2
90S-UTPA	Utp10	200 kDa	9	7	0.045	0.035	0.0104198	0.00827273	-0.332899
90S-UTPA	Utp8	80 kDa	6	1	0.075	0.0125	0.0173664	0.00295455	-2.55529
90S-UTPA	Utp9	65 kDa	3	2	0.0461538	0.0307692	0.010687	0.00727273	-0.555292
90S-UTPA	Utp15	58 kDa	3	1	0.0517241	0.0172414	0.0119768	0.00407524	-1.55529
90S-UTPB	Pwp2	104 kDa	10	2	0.0961538	0.0192308	0.0222646	0.00454545	-2.29226		Scaffold 5.0.0
90S-UTPB	Utp21	105 kDa	11	2	0.104762	0.0190476	0.0242578	0.00450216	-2.42976		Total Spectrum Count
90S-UTPB	Utp13	91 kDa	9	4	0.0989011	0.043956	0.0229008	0.0103896	-1.14025		Protein Threshold 99%
90S-UTPB	Dip2	106 kDa	8	1	0.0754717	0.00943396	0.0174756	0.00222985	-2.97033		Minimum # peptides 2
90S-U3	Nop1	34 kDa	15	10	0.441176	0.294118	0.102155	0.0695187	-0.555292		Peptide Threshold 1% FDR
90S-U3	Nop56	57 kDa	6	6	0.105263	0.105263	0.0243739	0.0248804	0.0296709		* All "0" RSAB values were replaced with "0.001"
90S-U3	Nop58	57 kDa	6	4	0.105263	0.0701754	0.0243739	0.0165869	-0.555292
90S-U3	Snu13	14 kDa	4	0	0.285714	0	0.0661578	0.001	-6.04784
90S-5ETS	Utp7	62 kDa	3	2	0.0483871	0.0322581	0.0112041	0.00762463	-0.555292
90S-5ETS	Sas10	70 kDa	3	3	0.0428571	0.0428571	0.00992366	0.0101299	0.0296709
90S-MPP10	Mpp10	67 kDa	4	2	0.0597015	0.0298507	0.013824	0.00705563	-0.970329
90S-5	Bfr2	61 kDa	6	2	0.0983607	0.0327869	0.0227756	0.00774963	-1.55529
90S-5	Lcp5	41 kDa	2	3	0.0487805	0.0731707	0.0112952	0.0172949	0.614633
90S-5	Efg1	27 kDa	0	3	0	0.111111	0.001	0.0262626	4.71494
90S-5=	Hca4	87 kDa	38	45	0.436782	0.517241	0.101138	0.122257	0.273596
90S-C	Krr1	37 kDa	31	12	0.837838	0.324324	0.194003	0.0766585	-1.33956
90S-C	Utp22	140 kDa	42	16	0.3	0.114286	0.0694656	0.027013	-1.36265
90S-C	Rrp5	193 kDa	26	9	0.134715	0.0466321	0.0311936	0.0110221	-1.50084
90S-C	Rok1	64 kDa	2	5	0.03125	0.078125	0.00723601	0.0184659	1.3516
90S-C=	Kri1	69 kDa	4	11	0.057971	0.15942	0.0134233	0.0376812	1.4891
90S-C= HACA	Gar1	21 kDa	3	2	0.142857	0.0952381	0.0330789	0.0225108	-0.555292
90S-3M=	Nop6	25 kDa	15	12	0.6	0.48	0.138931	0.113455	-0.292257
90S-Late	Bms1	136 kDa	57	39	0.419118	0.286765	0.0970476	0.0677807	-0.517817
90S-Late	Rcl1	40 kDa	17	18	0.425	0.45	0.0984097	0.106364	0.112133
90S-Late	Utp30	32 kDa	13	5	0.40625	0.15625	0.0940681	0.0369318	-1.34884
90S-Late	Kre33	119 kDa	8	10	0.0672269	0.0840336	0.0155665	0.0198625	0.351599
90S-Late	Nop14	94 kDa	4	4	0.0425532	0.0425532	0.00985328	0.010058	0.0296709
90S-Late	Utp14	103 kDa	3	1	0.0291262	0.00970874	0.00674424	0.00229479	-1.55529
90S-Late	Noc4	64 kDa	4	1	0.0625	0.015625	0.014472	0.00369318	-1.97033
pre-40S	Nob1	52 kDa	157	186	3.01923	3.57692	0.699109	0.845455	0.274209
pre-40S	Slx9	24 kDa	39	75	1.625	3.125	0.376272	0.738636	0.973087
pre-40S	Tsr1	91 kDa	393	385	4.31868	4.23077	1	1	0
pre-40S	Ltv1	53 kDa	290	321	5.4717	6.0566	1.26698	1.43156	0.176191
pre-40S	Hrr25	57 kDa	286	305	5.01754	5.35088	1.16182	1.26475	0.122465
pre-40S	Rio2	49 kDa	328	326	6.69388	6.65306	1.54998	1.57254	0.020847
pre-40S	Rio1	56 kDa	49	61	0.875	1.08929	0.202608	0.257468	0.345698
90S/pre-40S	Dim1	36 kDa	229	263	6.36111	7.30556	1.47293	1.72677	0.229386
90S/pre-40S	Enp1	55 kDa	369	394	6.70909	7.16364	1.5535	1.69322	0.124246
90S/pre-40S	Rrp12	138 kDa	181	415	1.31159	3.00725	0.303702	0.710804	1.22679
90S/pre-40S	Pno1	30 kDa	177	220	5.9	7.33333	1.36616	1.73333	0.343425
90S/pre-40S	Bud23	31 kDa	14	29	0.451613	0.935484	0.104572	0.221114	1.0803
90S/pre-40S	Trm112	15 kDa	9	15	0.6	1	0.138931	0.236364	0.766636
SSU RP (A)	Rps3	27 kDa	161	163	5.96296	6.03704	1.38074	1.42694	0.0474821
SSU RP (A)	Rps1A	29 kDa	155	177	5.34483	6.10345	1.23761	1.44263	0.221152
SSU RP (A)	Rps4A	29 kDa	168	167	5.7931	5.75862	1.34141	1.36113	0.0210577
SSU RP (A)	Rps18A	17 kDa	126	142	7.41176	8.35294	1.71621	1.97433	0.202138
SSU RP (A)	Rps0A	28 kDa	135	114	4.82143	4.07143	1.11641	0.962338	-0.214255
SSU RP (A)	Asc1	35 kDa	133	110	3.8	3.14286	0.879898	0.742857	-0.244252
SSU RP (A)	Rps5	25 kDa	106	110	4.24	4.4	0.981781	1.04	0.0831101
SSU RP (A)	Rps13	17 kDa	95	108	5.58824	6.35294	1.29397	1.5016	0.214703
SSU RP (A)	Rps12	15 kDa	113	94	7.53333	6.26667	1.74436	1.48121	-0.235919
SSU RP (A)	Rps2	27 kDa	93	83	3.44444	3.07407	0.797569	0.726599	-0.134449
SSU RP (A)	Rps7A	22 kDa	77	96	3.5	4.36364	0.810433	1.0314	0.347847
SSU RP (A)	Rps17A	16 kDa	79	81	4.9375	5.0625	1.14329	1.19659	0.0657401
SSU RP (A)	Rps24A	15 kDa	73	77	4.86667	5.13333	1.12689	1.21333	0.106633
SSU RP (A)	Rps9A	22 kDa	74	76	3.36364	3.45455	0.778857	0.816529	0.068145
SSU RP (A)	Rps15	16 kDa	63	70	3.9375	4.375	0.911737	1.03409	0.181674
SSU RP (A)	Rps20	14 kDa	65	59	4.64286	4.21429	1.07506	0.996104	-0.110054
SSU RP (A)	Rps25A	12 kDa	43	41	3.58333	3.41667	0.829729	0.807576	-0.0390419
SSU RP (A)	Rps28A	8 kDa	30	34	3.75	4.25	0.868321	1.00455	0.210243
SSU RP (A)	Rps29A	7 kDa	20	31	2.85714	4.42857	0.661578	1.04675	0.661939
SSU RP (A)	Rps31	17 kDa	25	24	1.47059	1.41176	0.340518	0.33369	-0.0292228
SSU RP (A)	Rps27A	9 kDa	21	16	2.33333	1.77778	0.540288	0.420202	-0.362647
SSU RP (A)	Rps10A	13 kDa	15	7	1.15385	0.538462	0.267176	0.127273	-1.06986
SSU RP (B)	Rps1B	29 kDa	161	186	5.55172	6.41379	1.28551	1.51599	0.237913
SSU RP (B)	Rps14B	15 kDa	122	123	8.13333	8.2	1.88329	1.93818	0.041448
SSU RP (B)	Rps19B	16 kDa	110	110	6.875	6.875	1.59192	1.625	0.0296709
SSU RP (B)	Rps6B	27 kDa	96	98	3.55556	3.62963	0.823297	0.857912	0.0594182
SSU RP (B)	Rps9B	22 kDa	99	104	4.5	4.72727	1.04198	1.11736	0.100754
SSU RP (B)	Rps16B	16 kDa	91	90	5.6875	5.625	1.31695	1.32955	0.0137293
SSU RP (B)	Rps22B	15 kDa	109	106	7.26667	7.06667	1.68261	1.6703	-0.010593
SSU RP (B)	Rps7B	22 kDa	81	71	3.68182	3.22727	0.852533	0.76281	-0.160432
SSU RP (B)	Rps11B	18 kDa	68	76	3.77778	4.22222	0.874753	0.99798	0.190136
SSU RP (B)	Rps8B	22 kDa	62	68	2.81818	3.09091	0.652556	0.730579	0.162937
SSU RP (B)	Rps21B	10 kDa	60	50	6	5	1.38931	1.18182	-0.233364
SSU RP (B)	Rps29B	7 kDa	12	17	1.71429	2.42857	0.396947	0.574026	0.532171
SSU RP (B)	Rps30B	7 kDa	19	20	2.71429	2.85714	0.628499	0.675325	0.103671
SSU RP (B)	Rps23B	16 kDa	21	17	1.3125	1.0625	0.303912	0.251136	-0.275184
SSU RP (B)	Rps26B	13 kDa	8	6	0.615385	0.461538	0.142494	0.109091	-0.385367
SSU RP (B)	Rps0B	28 kDa	126	106	4.5	3.78571	1.04198	0.894805	-0.219689
pre-60S	Nop12	52 kDa	39	78	0.75	1.5	0.173664	0.354545	1.02967
pre-60S	Dbp2	61 kDa	27	62	0.442623	1.01639	0.10249	0.240238	1.22898
pre-60S	Mex67	67 kDa	20	26	0.298507	0.38806	0.06912	0.0917232	0.408182
pre-60S	Drs1	85 kDa	18	1	0.211765	0.0117647	0.0490346	0.00278075	-4.14025
pre-60S	Nug1	58 kDa	0	12	0	0.206897	0.001	0.0489028	5.61185
pre-60S	Dbp9	68 kDa	4	6	0.0588235	0.0882353	0.0136207	0.0208556	0.614633
pre-60S	Nop4	78 kDa	2	5	0.025641	0.0641026	0.00593723	0.0151515	1.3516
pre-60S	Rat1	116 kDa	1	6	0.00862069	0.0517241	0.00199614	0.0122257	2.61463
pre-60S	Rex4	33 kDa	1	2	0.030303	0.0606061	0.00701673	0.0143251	1.02967
pre-60S	Nog1	74 kDa	2	5	0.027027	0.0675676	0.00625817	0.0159705	1.3516
pre-60S	Ebp2	50 kDa	1	1	0.02	0.02	0.00463104	0.00472727	0.0296709
pre-60S	Tif6	26 kDa	4	0	0.153846	0	0.0356234	0.001	-5.15475
pre-60S	Dbp3	59 kDa	0	3	0	0.0508475	0.001	0.0120185	3.58718
LSU RP (A)	Rpl4A	39 kDa	45	31	1.15385	0.794872	0.267176	0.187879	-0.507986
LSU RP (A)	Rpl3	44 kDa	21	16	0.477273	0.363636	0.110514	0.0859504	-0.362647
LSU RP (A)	Rpp0	34 kDa	21	14	0.617647	0.411765	0.143018	0.0973262	-0.555292
LSU RP (A)	Rpl23A	14 kDa	18	11	1.28571	0.785714	0.29771	0.185714	-0.680823
LSU RP (A)	Rpl16A	22 kDa	20	11	0.909091	0.5	0.210502	0.118182	-0.832826
LSU RP (A)	Rpl30	11 kDa	15	13	1.36364	1.18182	0.315753	0.279339	-0.17678
LSU RP (A)	Rpl17A	21 kDa	10	14	0.47619	0.666667	0.110263	0.157576	0.515098
LSU RP (A)	Rpl12A	18 kDa	12	11	0.666667	0.611111	0.154368	0.144444	-0.09586
LSU RP (A)	Rpl6A	20 kDa	11	12	0.55	0.6	0.127354	0.141818	0.155202
LSU RP (A)	Rpl5	34 kDa	15	10	0.441176	0.294118	0.102155	0.0695187	-0.555292
LSU RP (A)	Rpl9A	22 kDa	6	20	0.272727	0.909091	0.0631506	0.214876	1.76664
LSU RP (A)	Rpl21A	18 kDa	9	5	0.5	0.277778	0.115776	0.0656566	-0.818326
LSU RP (A)	Rpl1A	24 kDa	9	6	0.375	0.25	0.0868321	0.0590909	-0.555292
LSU RP (A)	Rpl25	16 kDa	10	3	0.625	0.1875	0.14472	0.0443182	-1.70729
LSU RP (A)	Rpl14A	15 kDa	8	6	0.533333	0.4	0.123494	0.0945455	-0.385367
LSU RP (A)	Rpl15A	24 kDa	8	2	0.333333	0.0833333	0.0771841	0.019697	-1.97033
LSU RP (A)	Rpl10	25 kDa	9	4	0.36	0.16	0.0833588	0.0378182	-1.14025
LSU RP (A)	Rpl24A	18 kDa	7	7	0.388889	0.388889	0.0900481	0.0919192	0.0296709
LSU RP (A)	Rpl31A	13 kDa	7	6	0.538462	0.461538	0.124682	0.109091	-0.192722
LSU RP (A)	Rpl18A	21 kDa	6	4	0.285714	0.190476	0.0661578	0.0450216	-0.555292
LSU RP (A)	Rpl22A	14 kDa	8	7	0.571429	0.5	0.132316	0.118182	-0.162974
LSU RP (A)	Rpl28	17 kDa	4	5	0.235294	0.294118	0.0544829	0.0695187	0.351599
LSU RP (A)	Rpp2A	11 kDa	5	5	0.454545	0.454545	0.105251	0.107438	0.0296709
LSU RP (A)	Rpl38	9 kDa	3	3	0.333333	0.333333	0.0771841	0.0787879	0.0296709
LSU RP (B)	Rpl20B	20 kDa	31	35	1.55	1.75	0.358906	0.413636	0.204758
LSU RP (B)	Rpl7B	28 kDa	27	34	0.964286	1.21429	0.223282	0.287013	0.362246
LSU RP (B)	Rpl8B	28 kDa	21	25	0.75	0.892857	0.173664	0.211039	0.28121
LSU RP (B)	Rpl13B	23 kDa	12	14	0.521739	0.608696	0.12081	0.143874	0.252063
LSU RP (B)	Rpl2B	27 kDa	18	8	0.666667	0.296296	0.154368	0.0700337	-1.14025
LSU RP (B)	Rpl16B	22 kDa	14	12	0.636364	0.545455	0.147351	0.128926	-0.192722
LSU RP (B)	Rpl36B	11 kDa	7	10	0.636364	0.909091	0.147351	0.214876	0.544244
LSU RP (B)	Rpl19B	22 kDa	11	10	0.5	0.454545	0.115776	0.107438	-0.107833
LSU RP (B)	Rpl6B	20 kDa	10	9	0.5	0.45	0.115776	0.106364	-0.122332
LSU RP (B)	Rpl11B	20 kDa	9	12	0.45	0.6	0.104198	0.141818	0.444708
LSU RP (B)	Rpl35B	14 kDa	14	8	1	0.571429	0.231552	0.135065	-0.777684
LSU RP (B)	Rpl27B	16 kDa	9	8	0.5625	0.5	0.130248	0.118182	-0.140254
LSU RP (B)	Rpp2B	11 kDa	6	4	0.545455	0.363636	0.126301	0.0859504	-0.555292
LSU RP (B)	Rpl26B	14 kDa	6	3	0.428571	0.214286	0.0992366	0.0506494	-0.970329
LSU RP (B)	Rpl43B	10 kDa	3	4	0.3	0.4	0.0694656	0.0945455	0.444708
Others	Ssb2	67 kDa	95	109	1.41791	1.62687	0.32832	0.384532	0.228
Others	Ssa1	70 kDa	79	127	1.12857	1.81429	0.261323	0.428831	0.714575
Others	Ssb1	67 kDa	91	104	1.35821	1.55224	0.314496	0.366893	0.222316
Others	Ssa2	69 kDa	77	122	1.11594	1.76812	0.258399	0.417918	0.693622
Others	Ty1B-Er1	199 kDa	82	67	0.41206	0.336683	0.0954135	0.0795797	-0.261792
Others	eIF2A	71 kDa	23	59	0.323944	0.830986	0.0750099	0.196415	1.38875
Others	Otu2	36 kDa	31	42	0.861111	1.16667	0.199392	0.275758	0.467792
Others	Pus4	45 kDa	21	39	0.466667	0.866667	0.108058	0.204848	0.922756
Others	Sro9	48 kDa	34	39	0.708333	0.8125	0.164016	0.192045	0.22761
Others	Tma64	64 kDa	12	32	0.1875	0.5	0.043416	0.118182	1.44471
Others	Yra1	25 kDa	20	27	0.8	1.08	0.185242	0.255273	0.46263
Others	Tef1	50 kDa	33	17	0.66	0.34	0.152824	0.0803636	-0.92726
Others	Pab1	64 kDa	5	5	0.078125	0.078125	0.01809	0.0184659	0.0296709
Others	Sui3	32 kDa	13	16	0.40625	0.5	0.0940681	0.118182	0.329231
Others	Ded1	66 kDa	15	14	0.227273	0.212121	0.0526255	0.0501377	-0.0698648
Others	Pdc1	61 kDa	36	11	0.590164	0.180328	0.136654	0.042623	-1.68082
Others	Rtt107	123 kDa	6	10	0.0487805	0.0813008	0.0112952	0.0192166	0.766636
Others	Imd3	57 kDa	19	10	0.333333	0.175439	0.0771841	0.0414673	-0.896329
Others	Sse1	77 kDa	9	24	0.116883	0.311688	0.0270645	0.0736718	1.44471
Others	Stm1	30 kDa	13	11	0.433333	0.366667	0.100339	0.0866667	-0.211337
Others	Tdh3	36 kDa	18	11	0.5	0.305556	0.115776	0.0722222	-0.680823
Others	Fas1	229 kDa	13	14	0.0567686	0.0611354	0.0131449	0.0144502	0.136586
Others	Pbp1	79 kDa	16	19	0.202532	0.240506	0.0468966	0.056847	0.277598
Others	Htb2	14 kDa	10	8	0.714286	0.571429	0.165394	0.135065	-0.292257
Others	Hta2	14 kDa	10	9	0.714286	0.642857	0.165394	0.151948	-0.122332
Others	Ssc1	71 kDa	6	15	0.084507	0.211268	0.0195678	0.049936	1.3516
Others	Cdc19	55 kDa	12	4	0.218182	0.0727273	0.0505205	0.0171901	-1.55529
Others	Gcd11	58 kDa	9	7	0.155172	0.12069	0.0359305	0.0285266	-0.332899
Others	Pbp4	20 kDa	8	10	0.4	0.5	0.0926209	0.118182	0.351599
Others	Htz1	14 kDa	5	3	0.357143	0.214286	0.0826972	0.0506494	-0.707295
Others	Pgk1	45 kDa	23	1	0.511111	0.0222222	0.118349	0.00525253	-4.49389
Others	Fas2	207 kDa	7	5	0.0338164	0.0241546	0.00783027	0.00570927	-0.455756
Others	Yef3	116 kDa	8	5	0.0689655	0.0431034	0.0159691	0.0101881	-0.648401
Others	Mtr2	21 kDa	4	5	0.190476	0.238095	0.0441052	0.0562771	0.351599
Others	Hhf1	11 kDa	6	4	0.545455	0.363636	0.126301	0.0859504	-0.555292
Others	Adh1	37 kDa	13	2	0.351351	0.0540541	0.0813562	0.0127764	-2.67077
Others	Nat1	99 kDa	4	3	0.040404	0.030303	0.00935564	0.00716253	-0.385367
Others	Hsc82	81 kDa	6	5	0.0740741	0.0617284	0.017152	0.0145903	-0.233364
Others	Lhp1	32 kDa	5	6	0.15625	0.1875	0.03618	0.0443182	0.292705
Others	Eno2	47 kDa	7	3	0.148936	0.0638298	0.0344865	0.015087	-1.19272
Others	Mhp1	155 kDa	4	5	0.0258065	0.0322581	0.00597554	0.00762463	0.351599
Others	Hsp60	61 kDa	1	3	0.0163934	0.0491803	0.00379594	0.0116244	1.61463
Others	Mrx1	80 kDa	3	5	0.0375	0.0625	0.00868321	0.0147727	0.766636
Others	Tif1	45 kDa	9	4	0.2	0.0888889	0.0463104	0.0210101	-1.14025
Others	Act1	42 kDa	9	3	0.214286	0.0714286	0.0496183	0.0168831	-1.55529
Others	Mss116	76 kDa	10	2	0.131579	0.0263158	0.0304674	0.0062201	-2.29226
Others	Mud2	60 kDa	2	2	0.0333333	0.0333333	0.00771841	0.00787879	0.0296709
Others	Her1	139 kDa	5	5	0.0359712	0.0359712	0.00832921	0.00850229	0.0296709
Others	Fun12	112 kDa	3	7	0.0267857	0.0625	0.00620229	0.0147727	1.25206
Others	Sui2	35 kDa	2	3	0.0571429	0.0857143	0.0132316	0.0202597	0.614633
Others	Eft1	93 kDa	9	4	0.0967742	0.0430108	0.0224083	0.0101662	-1.14025
Others	Xrn1	175 kDa	0	4	0	0.0228571	0.001	0.0054026	2.43365
Others	Lsm12	21 kDa	5	7	0.238095	0.333333	0.0551315	0.0787879	0.515098
Others	Fba1	40 kDa	7	2	0.175	0.05	0.0405216	0.0118182	-1.77768
Others	Air1	42 kDa	0	5	0	0.119048	0.001	0.0281385	4.81447
Others	YPR117W	286 kDa	2	1	0.00699301	0.0034965	0.00161925	0.000826446	-0.970329
Others	Rny1	50 kDa	2	4	0.04	0.08	0.00926209	0.0189091	1.02967
Others	His1	32 kDa	1	3	0.03125	0.09375	0.00723601	0.0221591	1.61463
Others	Mrpl22	35 kDa	1	2	0.0285714	0.0571429	0.00661578	0.0135065	1.02967
Others	Mis1	106 kDa	2	4	0.0188679	0.0377358	0.00436891	0.00891938	1.02967
Others	Cce1	41 kDa	3	4	0.0731707	0.097561	0.0169428	0.0230599	0.444708
Others	Coq2	41 kDa	1	3	0.0243902	0.0731707	0.00564761	0.0172949	1.61463
Others	Rie1	90 kDa	2	2	0.0222222	0.0222222	0.0051456	0.00525253	0.0296709
Others	Tea1	87 kDa	2	2	0.0229885	0.0229885	0.00532304	0.00543365	0.0296709
Others	Irc5	97 kDa	0	2	0	0.0206186	0.001	0.00487348	2.28495
Others	Ism1	116 kDa	4	1	0.0344828	0.00862069	0.00798456	0.00203762	-1.97033
Others	Sec7	227 kDa	4	1	0.0176211	0.00440529	0.00408021	0.00104125	-1.97033
Others	Gip4	87 kDa	3	2	0.0344828	0.0229885	0.00798456	0.00543365	-0.555292
Others	Sir1	77 kDa	1	5	0.012987	0.0649351	0.00300717	0.0153483	2.3516
Others	Msl5	53 kDa	1	0	0.0188679	0	0.00436891	0.001	-2.12727
Others	Dyn1	471 kDa	3	2	0.00636943	0.00424628	0.00147485	0.00100367	-0.555292
Others	Pmc1	131 kDa	0	1	0	0.00763359	0.001	0.0018043	0.851441
Others	Hsp104	102 kDa	4	0	0.0392157	0	0.00908048	0.001	-3.18277
Others	Rad18	55 kDa	3	0	0.0545455	0	0.0126301	0.001	-3.6588
Others	Snf2	194 kDa	1	0	0.00515464	0	0.00119357	0.001	-0.255281
Others	Nop13	46 kDa	3	0	0.0652174	0	0.0151012	0.001	-3.91659
Others	Sen1	253 kDa	2	0	0.00790514	0	0.00183045	0.001	-0.8722
Others	Rod1	92 kDa	0	2	0	0.0217391	0.001	0.00513834	2.3613
Others	Drs2	154 kDa	1	3	0.00649351	0.0194805	0.00150359	0.00460449	1.61463
Others	Gpm1	28 kDa	3	2	0.107143	0.0714286	0.0248092	0.0168831	-0.555292
Others	Vps41	113 kDa	3	2	0.0265487	0.0176991	0.0061474	0.00418343	-0.555292
Others	Pan2	127 kDa	0	0	0	0	0.001	0.001	0
Others	YHR127W	27 kDa	1	1	0.037037	0.037037	0.00857601	0.00875421	0.0296709
Others	Rai1	45 kDa	0	2	0	0.0444444	0.001	0.0105051	3.39301
Others	Net1	129 kDa	1	2	0.00775194	0.0155039	0.00179498	0.00366455	1.02967
Others	Yta6	85 kDa	1	0	0.0117647	0	0.00272414	0.001	-1.4458
Others	Ssk2	181 kDa	2	1	0.0110497	0.00552486	0.00255859	0.00130588	-0.970329
Others	Sgs1	164 kDa	2	0	0.0121951	0	0.00282381	0.001	-1.49764
Others	Cti6	57 kDa	2	1	0.0350877	0.0175439	0.00812464	0.00414673	-0.970329
Others	Neo1	130 kDa	2	4	0.0153846	0.0307692	0.00356234	0.00727273	1.02967
Others	Ssk1	79 kDa	0	0	0	0	0.001	0.001	0
Others	Rap1	92 kDa	4	0	0.0434783	0	0.0100675	0.001	-3.33163
Others	Tpi1	27 kDa	4	0	0.148148	0	0.034304	0.001	-5.10031
Others	Pfk1	108 kDa	2	1	0.0185185	0.00925926	0.004288	0.00218855	-0.970329
Others	Thp1	53 kDa	1	2	0.0188679	0.0377358	0.00436891	0.00891938	1.02967
Others	Itt1	54 kDa	2	1	0.037037	0.0185185	0.00857601	0.0043771	-0.970329
Others	Prp28	67 kDa	1	1	0.0149254	0.0149254	0.003456	0.00352782	0.0296709
Others	Ybt1	189 kDa	0	0	0	0	0.001	0.001	0
Others	Ioc4	55 kDa	1	3	0.0181818	0.0545455	0.00421004	0.0128926	1.61463
Others	Met30	73 kDa	0	2	0	0.0273973	0.001	0.00647572	2.69504
Others	YBL086C	52 kDa	1	0	0.0192308	0	0.00445293	0.001	-2.15475
Others	Psa1	40 kDa	3	0	0.075	0	0.0173664	0.001	-4.11823
Others	Mcm3	108 kDa	1	0	0.00925926	0	0.002144	0.001	-1.10031
Others	YLL032C	95 kDa	2	0	0.0210526	0	0.00487478	0.001	-2.28534
Others	Hmi1	81 kDa	2	0	0.0246914	0	0.00571734	0.001	-2.51534

## Sheet: Calculations
Sub-complex	Protein	Molecular Weight	RPS2	PGAL-RPS2	Avg SpC	RPS2 PPMW	PGAL-RPS2 PPMW	RPS2 RSAB	PGAL-RPS2 RSAB	log2FC S2-/S2
90S-UTPA	Utp10	200 kDa	9	7	8	0.045	0.035	0.0104198	0.00827273	-0.332899
90S-UTPA	Utp8	80 kDa	6	1	3.5	0.075	0.0125	0.0173664	0.00295455	-2.55529
90S-UTPA	Utp9	65 kDa	3	2	2.5	0.0461538	0.0307692	0.010687	0.00727273	-0.555292
90S-UTPA	Utp15	58 kDa	3	1	2	0.0517241	0.0172414	0.0119768	0.00407524	-1.55529
90S-UTPB	Pwp2	104 kDa	10	2	6	0.0961538	0.0192308	0.0222646	0.00454545	-2.29226
90S-UTPB	Utp21	105 kDa	11	2	6.5	0.104762	0.0190476	0.0242578	0.00450216	-2.42976
90S-UTPB	Utp13	91 kDa	9	4	6.5	0.0989011	0.043956	0.0229008	0.0103896	-1.14025
90S-UTPB	Dip2	106 kDa	8	1	4.5	0.0754717	0.00943396	0.0174756	0.00222985	-2.97033
90S-U3	Nop1	34 kDa	15	10	12.5	0.441176	0.294118	0.102155	0.0695187	-0.555292
90S-U3	Nop56	57 kDa	6	6	6	0.105263	0.105263	0.0243739	0.0248804	0.0296709
90S-U3	Nop58	57 kDa	6	4	5	0.105263	0.0701754	0.0243739	0.0165869	-0.555292
90S-U3	Snu13	14 kDa	4	0	2	0.285714	0	0.0661578	0.001	-6.04784
90S-5ETS	Utp7	62 kDa	3	2	2.5	0.0483871	0.0322581	0.0112041	0.00762463	-0.555292
90S-5ETS	Sas10	70 kDa	3	3	3	0.0428571	0.0428571	0.00992366	0.0101299	0.0296709
90S-MPP10	Mpp10	67 kDa	4	2	3	0.0597015	0.0298507	0.013824	0.00705563	-0.970329
90S-5	Bfr2	61 kDa	6	2	4	0.0983607	0.0327869	0.0227756	0.00774963	-1.55529
90S-5	Lcp5	41 kDa	2	3	2.5	0.0487805	0.0731707	0.0112952	0.0172949	0.614633
90S-5	Efg1	27 kDa	0	3	1.5	0	0.111111	0.001	0.0262626	4.71494
90S-5=	Hca4	87 kDa	38	45	41.5	0.436782	0.517241	0.101138	0.122257	0.273596
90S-C	Krr1	37 kDa	31	12	21.5	0.837838	0.324324	0.194003	0.0766585	-1.33956
90S-C	Utp22	140 kDa	42	16	29	0.3	0.114286	0.0694656	0.027013	-1.36265
90S-C	Rrp5	193 kDa	26	9	17.5	0.134715	0.0466321	0.0311936	0.0110221	-1.50084
90S-C	Rok1	64 kDa	2	5	3.5	0.03125	0.078125	0.00723601	0.0184659	1.3516
90S-C=	Kri1	69 kDa	4	11	7.5	0.057971	0.15942	0.0134233	0.0376812	1.4891
90S-C= HACA	Gar1	21 kDa	3	2	2.5	0.142857	0.0952381	0.0330789	0.0225108	-0.555292
90S-3M=	Nop6	25 kDa	15	12	13.5	0.6	0.48	0.138931	0.113455	-0.292257
90S-Late	Bms1	136 kDa	57	39	48	0.419118	0.286765	0.0970476	0.0677807	-0.517817
90S-Late	Rcl1	40 kDa	17	18	17.5	0.425	0.45	0.0984097	0.106364	0.112133
90S-Late	Utp30	32 kDa	13	5	9	0.40625	0.15625	0.0940681	0.0369318	-1.34884
90S-Late	Kre33	119 kDa	8	10	9	0.0672269	0.0840336	0.0155665	0.0198625	0.351599
90S-Late	Nop14	94 kDa	4	4	4	0.0425532	0.0425532	0.00985328	0.010058	0.0296709
90S-Late	Utp14	103 kDa	3	1	2	0.0291262	0.00970874	0.00674424	0.00229479	-1.55529
90S-Late	Noc4	64 kDa	4	1	2.5	0.0625	0.015625	0.014472	0.00369318	-1.97033	Average SSU Processome log2FC
	All SSU Processome		11.3636	7.42424	9.39394			0.0408807	0.0275271		-0.773242
pre-40S	Nob1	52 kDa	157	186	171.5	3.01923	3.57692	0.699109	0.845455	0.274209
pre-40S	Slx9	24 kDa	39	75	57	1.625	3.125	0.376272	0.738636	0.973087
pre-40S	Tsr1	91 kDa	393	385	389	4.31868	4.23077	1	1	0
pre-40S	Ltv1	53 kDa	290	321	305.5	5.4717	6.0566	1.26698	1.43156	0.176191
pre-40S	Hrr25	57 kDa	286	305	295.5	5.01754	5.35088	1.16182	1.26475	0.122465
pre-40S	Rio2	49 kDa	328	326	327	6.69388	6.65306	1.54998	1.57254	0.020847
pre-40S	Rio1	56 kDa	49	61	55	0.875	1.08929	0.202608	0.257468	0.345698
90S/pre-40S	Dim1	36 kDa	229	263	246	6.36111	7.30556	1.47293	1.72677	0.229386
90S/pre-40S	Enp1	55 kDa	369	394	381.5	6.70909	7.16364	1.5535	1.69322	0.124246
90S/pre-40S	Rrp12	138 kDa	181	415	298	1.31159	3.00725	0.303702	0.710804	1.22679
90S/pre-40S	Pno1	30 kDa	177	220	198.5	5.9	7.33333	1.36616	1.73333	0.343425
90S/pre-40S	Bud23	31 kDa	14	29	21.5	0.451613	0.935484	0.104572	0.221114	1.0803
90S/pre-40S	Trm112	15 kDa	9	15	12	0.6	1	0.138931	0.236364	0.766636
SSU RP (A)	Rps3	27 kDa	161	163	162	5.96296	6.03704	1.38074	1.42694	0.0474821
SSU RP (A)	Rps1A	29 kDa	155	177	166	5.34483	6.10345	1.23761	1.44263	0.221152
SSU RP (A)	Rps4A	29 kDa	168	167	167.5	5.7931	5.75862	1.34141	1.36113	0.0210577
SSU RP (A)	Rps18A	17 kDa	126	142	134	7.41176	8.35294	1.71621	1.97433	0.202138
SSU RP (A)	Rps0A	28 kDa	135	114	124.5	4.82143	4.07143	1.11641	0.962338	-0.214255
SSU RP (A)	Asc1	35 kDa	133	110	121.5	3.8	3.14286	0.879898	0.742857	-0.244252
SSU RP (A)	Rps5	25 kDa	106	110	108	4.24	4.4	0.981781	1.04	0.0831101
SSU RP (A)	Rps13	17 kDa	95	108	101.5	5.58824	6.35294	1.29397	1.5016	0.214703
SSU RP (A)	Rps12	15 kDa	113	94	103.5	7.53333	6.26667	1.74436	1.48121	-0.235919
SSU RP (A)	Rps2	27 kDa	93	83	88	3.44444	3.07407	0.797569	0.726599	-0.134449
SSU RP (A)	Rps7A	22 kDa	77	96	86.5	3.5	4.36364	0.810433	1.0314	0.347847
SSU RP (A)	Rps17A	16 kDa	79	81	80	4.9375	5.0625	1.14329	1.19659	0.0657401
SSU RP (A)	Rps24A	15 kDa	73	77	75	4.86667	5.13333	1.12689	1.21333	0.106633
SSU RP (A)	Rps9A	22 kDa	74	76	75	3.36364	3.45455	0.778857	0.816529	0.068145
SSU RP (A)	Rps15	16 kDa	63	70	66.5	3.9375	4.375	0.911737	1.03409	0.181674
SSU RP (A)	Rps20	14 kDa	65	59	62	4.64286	4.21429	1.07506	0.996104	-0.110054
SSU RP (A)	Rps25A	12 kDa	43	41	42	3.58333	3.41667	0.829729	0.807576	-0.0390419
SSU RP (A)	Rps28A	8 kDa	30	34	32	3.75	4.25	0.868321	1.00455	0.210243
SSU RP (A)	Rps29A	7 kDa	20	31	25.5	2.85714	4.42857	0.661578	1.04675	0.661939
SSU RP (A)	Rps31	17 kDa	25	24	24.5	1.47059	1.41176	0.340518	0.33369	-0.0292228
SSU RP (A)	Rps27A	9 kDa	21	16	18.5	2.33333	1.77778	0.540288	0.420202	-0.362647
SSU RP (A)	Rps10A	13 kDa	15	7	11	1.15385	0.538462	0.267176	0.127273	-1.06986
SSU RP (B)	Rps1B	29 kDa	161	186	173.5	5.55172	6.41379	1.28551	1.51599	0.237913
SSU RP (B)	Rps14B	15 kDa	122	123	122.5	8.13333	8.2	1.88329	1.93818	0.041448
SSU RP (B)	Rps19B	16 kDa	110	110	110	6.875	6.875	1.59192	1.625	0.0296709
SSU RP (B)	Rps6B	27 kDa	96	98	97	3.55556	3.62963	0.823297	0.857912	0.0594182
SSU RP (B)	Rps9B	22 kDa	99	104	101.5	4.5	4.72727	1.04198	1.11736	0.100754
SSU RP (B)	Rps16B	16 kDa	91	90	90.5	5.6875	5.625	1.31695	1.32955	0.0137293
SSU RP (B)	Rps22B	15 kDa	109	106	107.5	7.26667	7.06667	1.68261	1.6703	-0.010593
SSU RP (B)	Rps7B	22 kDa	81	71	76	3.68182	3.22727	0.852533	0.76281	-0.160432
SSU RP (B)	Rps11B	18 kDa	68	76	72	3.77778	4.22222	0.874753	0.99798	0.190136
SSU RP (B)	Rps8B	22 kDa	62	68	65	2.81818	3.09091	0.652556	0.730579	0.162937
SSU RP (B)	Rps21B	10 kDa	60	50	55	6	5	1.38931	1.18182	-0.233364
SSU RP (B)	Rps29B	7 kDa	12	17	14.5	1.71429	2.42857	0.396947	0.574026	0.532171
SSU RP (B)	Rps30B	7 kDa	19	20	19.5	2.71429	2.85714	0.628499	0.675325	0.103671
SSU RP (B)	Rps23B	16 kDa	21	17	19	1.3125	1.0625	0.303912	0.251136	-0.275184
SSU RP (B)	Rps26B	13 kDa	8	6	7	0.615385	0.461538	0.142494	0.109091	-0.385367
SSU RP (B)	Rps0B	28 kDa	126	106	116	4.5	3.78571	1.04198	0.894805	-0.219689	Average 40S RPs log2FC
	All 40S RPs		81.9737	82.3158	82.1447			0.993484	1.0242		0.00472055
pre-60S	Nop12	52 kDa	39	78	58.5	0.75	1.5	0.173664	0.354545	1.02967
pre-60S	Dbp2	61 kDa	27	62	44.5	0.442623	1.01639	0.10249	0.240238	1.22898
pre-60S	Mex67	67 kDa	20	26	23	0.298507	0.38806	0.06912	0.0917232	0.408182
pre-60S	Drs1	85 kDa	18	1	9.5	0.211765	0.0117647	0.0490346	0.00278075	-4.14025
pre-60S	Nug1	58 kDa	0	12	6	0	0.206897	0.001	0.0489028	5.61185
pre-60S	Dbp9	68 kDa	4	6	5	0.0588235	0.0882353	0.0136207	0.0208556	0.614633
pre-60S	Nop4	78 kDa	2	5	3.5	0.025641	0.0641026	0.00593723	0.0151515	1.3516
pre-60S	Rat1	116 kDa	1	6	3.5	0.00862069	0.0517241	0.00199614	0.0122257	2.61463
pre-60S	Rex4	33 kDa	1	2	1.5	0.030303	0.0606061	0.00701673	0.0143251	1.02967
pre-60S	Nog1	74 kDa	2	5	3.5	0.027027	0.0675676	0.00625817	0.0159705	1.3516
pre-60S	Ebp2	50 kDa	1	1	1	0.02	0.02	0.00463104	0.00472727	0.0296709
pre-60S	Tif6	26 kDa	4	0	2	0.153846	0	0.0356234	0.001	-5.15475
pre-60S	Dbp3	59 kDa	0	3	1.5	0	0.0508475	0.001	0.0120185	3.58718
LSU RP (A)	Rpl4A	39 kDa	45	31	38	1.15385	0.794872	0.267176	0.187879	-0.507986
LSU RP (A)	Rpl3	44 kDa	21	16	18.5	0.477273	0.363636	0.110514	0.0859504	-0.362647
LSU RP (A)	Rpp0	34 kDa	21	14	17.5	0.617647	0.411765	0.143018	0.0973262	-0.555292
LSU RP (A)	Rpl23A	14 kDa	18	11	14.5	1.28571	0.785714	0.29771	0.185714	-0.680823
LSU RP (A)	Rpl16A	22 kDa	20	11	15.5	0.909091	0.5	0.210502	0.118182	-0.832826
LSU RP (A)	Rpl30	11 kDa	15	13	14	1.36364	1.18182	0.315753	0.279339	-0.17678
LSU RP (A)	Rpl17A	21 kDa	10	14	12	0.47619	0.666667	0.110263	0.157576	0.515098
LSU RP (A)	Rpl12A	18 kDa	12	11	11.5	0.666667	0.611111	0.154368	0.144444	-0.09586
LSU RP (A)	Rpl6A	20 kDa	11	12	11.5	0.55	0.6	0.127354	0.141818	0.155202
LSU RP (A)	Rpl5	34 kDa	15	10	12.5	0.441176	0.294118	0.102155	0.0695187	-0.555292
LSU RP (A)	Rpl9A	22 kDa	6	20	13	0.272727	0.909091	0.0631506	0.214876	1.76664
LSU RP (A)	Rpl21A	18 kDa	9	5	7	0.5	0.277778	0.115776	0.0656566	-0.818326
LSU RP (A)	Rpl1A	24 kDa	9	6	7.5	0.375	0.25	0.0868321	0.0590909	-0.555292
LSU RP (A)	Rpl25	16 kDa	10	3	6.5	0.625	0.1875	0.14472	0.0443182	-1.70729
LSU RP (A)	Rpl14A	15 kDa	8	6	7	0.533333	0.4	0.123494	0.0945455	-0.385367
LSU RP (A)	Rpl15A	24 kDa	8	2	5	0.333333	0.0833333	0.0771841	0.019697	-1.97033
LSU RP (A)	Rpl10	25 kDa	9	4	6.5	0.36	0.16	0.0833588	0.0378182	-1.14025
LSU RP (A)	Rpl24A	18 kDa	7	7	7	0.388889	0.388889	0.0900481	0.0919192	0.0296709
LSU RP (A)	Rpl31A	13 kDa	7	6	6.5	0.538462	0.461538	0.124682	0.109091	-0.192722
LSU RP (A)	Rpl18A	21 kDa	6	4	5	0.285714	0.190476	0.0661578	0.0450216	-0.555292
LSU RP (A)	Rpl22A	14 kDa	8	7	7.5	0.571429	0.5	0.132316	0.118182	-0.162974
LSU RP (A)	Rpl28	17 kDa	4	5	4.5	0.235294	0.294118	0.0544829	0.0695187	0.351599
LSU RP (A)	Rpp2A	11 kDa	5	5	5	0.454545	0.454545	0.105251	0.107438	0.0296709
LSU RP (A)	Rpl38	9 kDa	3	3	3	0.333333	0.333333	0.0771841	0.0787879	0.0296709
LSU RP (B)	Rpl20B	20 kDa	31	35	33	1.55	1.75	0.358906	0.413636	0.204758
LSU RP (B)	Rpl7B	28 kDa	27	34	30.5	0.964286	1.21429	0.223282	0.287013	0.362246
LSU RP (B)	Rpl8B	28 kDa	21	25	23	0.75	0.892857	0.173664	0.211039	0.28121
LSU RP (B)	Rpl13B	23 kDa	12	14	13	0.521739	0.608696	0.12081	0.143874	0.252063
LSU RP (B)	Rpl2B	27 kDa	18	8	13	0.666667	0.296296	0.154368	0.0700337	-1.14025
LSU RP (B)	Rpl16B	22 kDa	14	12	13	0.636364	0.545455	0.147351	0.128926	-0.192722
LSU RP (B)	Rpl36B	11 kDa	7	10	8.5	0.636364	0.909091	0.147351	0.214876	0.544244
LSU RP (B)	Rpl19B	22 kDa	11	10	10.5	0.5	0.454545	0.115776	0.107438	-0.107833
LSU RP (B)	Rpl6B	20 kDa	10	9	9.5	0.5	0.45	0.115776	0.106364	-0.122332
LSU RP (B)	Rpl11B	20 kDa	9	12	10.5	0.45	0.6	0.104198	0.141818	0.444708
LSU RP (B)	Rpl35B	14 kDa	14	8	11	1	0.571429	0.231552	0.135065	-0.777684
LSU RP (B)	Rpl27B	16 kDa	9	8	8.5	0.5625	0.5	0.130248	0.118182	-0.140254
LSU RP (B)	Rpp2B	11 kDa	6	4	5	0.545455	0.363636	0.126301	0.0859504	-0.555292
LSU RP (B)	Rpl26B	14 kDa	6	3	4.5	0.428571	0.214286	0.0992366	0.0506494	-0.970329
LSU RP (B)	Rpl43B	10 kDa	3	4	3.5	0.3	0.4	0.0694656	0.0945455	0.444708	Average log2FC 60S
	All 60S-related		11.6154	12.0962	11.8558			0.114868	0.110915		-0.00553667
Others	Ssb2	67 kDa	95	109	102	1.41791	1.62687	0.32832	0.384532	0.228
Others	Ssa1	70 kDa	79	127	103	1.12857	1.81429	0.261323	0.428831	0.714575
Others	Ssb1	67 kDa	91	104	97.5	1.35821	1.55224	0.314496	0.366893	0.222316
Others	Ssa2	69 kDa	77	122	99.5	1.11594	1.76812	0.258399	0.417918	0.693622
Others	Ty1B-Er1	199 kDa	82	67	74.5	0.41206	0.336683	0.0954135	0.0795797	-0.261792
Others	eIF2A	71 kDa	23	59	41	0.323944	0.830986	0.0750099	0.196415	1.38875
Others	Otu2	36 kDa	31	42	36.5	0.861111	1.16667	0.199392	0.275758	0.467792
Others	Pus4	45 kDa	21	39	30	0.466667	0.866667	0.108058	0.204848	0.922756
Others	Sro9	48 kDa	34	39	36.5	0.708333	0.8125	0.164016	0.192045	0.22761
Others	Tma64	64 kDa	12	32	22	0.1875	0.5	0.043416	0.118182	1.44471
Others	Yra1	25 kDa	20	27	23.5	0.8	1.08	0.185242	0.255273	0.46263
Others	Tef1	50 kDa	33	17	25	0.66	0.34	0.152824	0.0803636	-0.92726
Others	Pab1	64 kDa	5	5	5	0.078125	0.078125	0.01809	0.0184659	0.0296709
Others	Sui3	32 kDa	13	16	14.5	0.40625	0.5	0.0940681	0.118182	0.329231
Others	Ded1	66 kDa	15	14	14.5	0.227273	0.212121	0.0526255	0.0501377	-0.0698648
Others	Pdc1	61 kDa	36	11	23.5	0.590164	0.180328	0.136654	0.042623	-1.68082
Others	Rtt107	123 kDa	6	10	8	0.0487805	0.0813008	0.0112952	0.0192166	0.766636
Others	Imd3	57 kDa	19	10	14.5	0.333333	0.175439	0.0771841	0.0414673	-0.896329
Others	Sse1	77 kDa	9	24	16.5	0.116883	0.311688	0.0270645	0.0736718	1.44471
Others	Stm1	30 kDa	13	11	12	0.433333	0.366667	0.100339	0.0866667	-0.211337
Others	Tdh3	36 kDa	18	11	14.5	0.5	0.305556	0.115776	0.0722222	-0.680823
Others	Fas1	229 kDa	13	14	13.5	0.0567686	0.0611354	0.0131449	0.0144502	0.136586
Others	Pbp1	79 kDa	16	19	17.5	0.202532	0.240506	0.0468966	0.056847	0.277598
Others	Htb2	14 kDa	10	8	9	0.714286	0.571429	0.165394	0.135065	-0.292257
Others	Hta2	14 kDa	10	9	9.5	0.714286	0.642857	0.165394	0.151948	-0.122332
Others	Ssc1	71 kDa	6	15	10.5	0.084507	0.211268	0.0195678	0.049936	1.3516
Others	Cdc19	55 kDa	12	4	8	0.218182	0.0727273	0.0505205	0.0171901	-1.55529
Others	Gcd11	58 kDa	9	7	8	0.155172	0.12069	0.0359305	0.0285266	-0.332899
Others	Pbp4	20 kDa	8	10	9	0.4	0.5	0.0926209	0.118182	0.351599
Others	Htz1	14 kDa	5	3	4	0.357143	0.214286	0.0826972	0.0506494	-0.707295
Others	Pgk1	45 kDa	23	1	12	0.511111	0.0222222	0.118349	0.00525253	-4.49389
Others	Fas2	207 kDa	7	5	6	0.0338164	0.0241546	0.00783027	0.00570927	-0.455756
Others	Yef3	116 kDa	8	5	6.5	0.0689655	0.0431034	0.0159691	0.0101881	-0.648401
Others	Mtr2	21 kDa	4	5	4.5	0.190476	0.238095	0.0441052	0.0562771	0.351599
Others	Hhf1	11 kDa	6	4	5	0.545455	0.363636	0.126301	0.0859504	-0.555292
Others	Adh1	37 kDa	13	2	7.5	0.351351	0.0540541	0.0813562	0.0127764	-2.67077
Others	Nat1	99 kDa	4	3	3.5	0.040404	0.030303	0.00935564	0.00716253	-0.385367
Others	Hsc82	81 kDa	6	5	5.5	0.0740741	0.0617284	0.017152	0.0145903	-0.233364
Others	Lhp1	32 kDa	5	6	5.5	0.15625	0.1875	0.03618	0.0443182	0.292705
Others	Eno2	47 kDa	7	3	5	0.148936	0.0638298	0.0344865	0.015087	-1.19272
Others	Mhp1	155 kDa	4	5	4.5	0.0258065	0.0322581	0.00597554	0.00762463	0.351599
Others	Hsp60	61 kDa	1	3	2	0.0163934	0.0491803	0.00379594	0.0116244	1.61463
Others	Mrx1	80 kDa	3	5	4	0.0375	0.0625	0.00868321	0.0147727	0.766636
Others	Tif1	45 kDa	9	4	6.5	0.2	0.0888889	0.0463104	0.0210101	-1.14025
Others	Act1	42 kDa	9	3	6	0.214286	0.0714286	0.0496183	0.0168831	-1.55529
Others	Mss116	76 kDa	10	2	6	0.131579	0.0263158	0.0304674	0.0062201	-2.29226
Others	Mud2	60 kDa	2	2	2	0.0333333	0.0333333	0.00771841	0.00787879	0.0296709
Others	Her1	139 kDa	5	5	5	0.0359712	0.0359712	0.00832921	0.00850229	0.0296709
Others	Fun12	112 kDa	3	7	5	0.0267857	0.0625	0.00620229	0.0147727	1.25206
Others	Sui2	35 kDa	2	3	2.5	0.0571429	0.0857143	0.0132316	0.0202597	0.614633
Others	Eft1	93 kDa	9	4	6.5	0.0967742	0.0430108	0.0224083	0.0101662	-1.14025
Others	Xrn1	175 kDa	0	4	2	0	0.0228571	0.001	0.0054026	2.43365
Others	Lsm12	21 kDa	5	7	6	0.238095	0.333333	0.0551315	0.0787879	0.515098
Others	Fba1	40 kDa	7	2	4.5	0.175	0.05	0.0405216	0.0118182	-1.77768
Others	Air1	42 kDa	0	5	2.5	0	0.119048	0.001	0.0281385	4.81447
Others	YPR117W	286 kDa	2	1	1.5	0.00699301	0.0034965	0.00161925	0.000826446	-0.970329
Others	Rny1	50 kDa	2	4	3	0.04	0.08	0.00926209	0.0189091	1.02967
Others	His1	32 kDa	1	3	2	0.03125	0.09375	0.00723601	0.0221591	1.61463
Others	Mrpl22	35 kDa	1	2	1.5	0.0285714	0.0571429	0.00661578	0.0135065	1.02967
Others	Mis1	106 kDa	2	4	3	0.0188679	0.0377358	0.00436891	0.00891938	1.02967
Others	Cce1	41 kDa	3	4	3.5	0.0731707	0.097561	0.0169428	0.0230599	0.444708
Others	Coq2	41 kDa	1	3	2	0.0243902	0.0731707	0.00564761	0.0172949	1.61463
Others	Rie1	90 kDa	2	2	2	0.0222222	0.0222222	0.0051456	0.00525253	0.0296709
Others	Tea1	87 kDa	2	2	2	0.0229885	0.0229885	0.00532304	0.00543365	0.0296709
Others	Irc5	97 kDa	0	2	1	0	0.0206186	0.001	0.00487348	2.28495
Others	Ism1	116 kDa	4	1	2.5	0.0344828	0.00862069	0.00798456	0.00203762	-1.97033
Others	Sec7	227 kDa	4	1	2.5	0.0176211	0.00440529	0.00408021	0.00104125	-1.97033
Others	Gip4	87 kDa	3	2	2.5	0.0344828	0.0229885	0.00798456	0.00543365	-0.555292
Others	Sir1	77 kDa	1	5	3	0.012987	0.0649351	0.00300717	0.0153483	2.3516
Others	Msl5	53 kDa	1	0	0.5	0.0188679	0	0.00436891	0.001	-2.12727
Others	Dyn1	471 kDa	3	2	2.5	0.00636943	0.00424628	0.00147485	0.00100367	-0.555292
Others	Pmc1	131 kDa	0	1	0.5	0	0.00763359	0.001	0.0018043	0.851441
Others	Hsp104	102 kDa	4	0	2	0.0392157	0	0.00908048	0.001	-3.18277
Others	Rad18	55 kDa	3	0	1.5	0.0545455	0	0.0126301	0.001	-3.6588
Others	Snf2	194 kDa	1	0	0.5	0.00515464	0	0.00119357	0.001	-0.255281
Others	Nop13	46 kDa	3	0	1.5	0.0652174	0	0.0151012	0.001	-3.91659
Others	Sen1	253 kDa	2	0	1	0.00790514	0	0.00183045	0.001	-0.8722
Others	Rod1	92 kDa	0	2	1	0	0.0217391	0.001	0.00513834	2.3613
Others	Drs2	154 kDa	1	3	2	0.00649351	0.0194805	0.00150359	0.00460449	1.61463
Others	Gpm1	28 kDa	3	2	2.5	0.107143	0.0714286	0.0248092	0.0168831	-0.555292
Others	Vps41	113 kDa	3	2	2.5	0.0265487	0.0176991	0.0061474	0.00418343	-0.555292
Others	Pan2	127 kDa	0	0	0	0	0	0.001	0.001	0
Others	YHR127W	27 kDa	1	1	1	0.037037	0.037037	0.00857601	0.00875421	0.0296709
Others	Rai1	45 kDa	0	2	1	0	0.0444444	0.001	0.0105051	3.39301
Others	Net1	129 kDa	1	2	1.5	0.00775194	0.0155039	0.00179498	0.00366455	1.02967
Others	Yta6	85 kDa	1	0	0.5	0.0117647	0	0.00272414	0.001	-1.4458
Others	Ssk2	181 kDa	2	1	1.5	0.0110497	0.00552486	0.00255859	0.00130588	-0.970329
Others	Sgs1	164 kDa	2	0	1	0.0121951	0	0.00282381	0.001	-1.49764
Others	Cti6	57 kDa	2	1	1.5	0.0350877	0.0175439	0.00812464	0.00414673	-0.970329
Others	Neo1	130 kDa	2	4	3	0.0153846	0.0307692	0.00356234	0.00727273	1.02967
Others	Ssk1	79 kDa	0	0	0	0	0	0.001	0.001	0
Others	Rap1	92 kDa	4	0	2	0.0434783	0	0.0100675	0.001	-3.33163
Others	Tpi1	27 kDa	4	0	2	0.148148	0	0.034304	0.001	-5.10031
Others	Pfk1	108 kDa	2	1	1.5	0.0185185	0.00925926	0.004288	0.00218855	-0.970329
Others	Thp1	53 kDa	1	2	1.5	0.0188679	0.0377358	0.00436891	0.00891938	1.02967
Others	Itt1	54 kDa	2	1	1.5	0.037037	0.0185185	0.00857601	0.0043771	-0.970329
Others	Prp28	67 kDa	1	1	1	0.0149254	0.0149254	0.003456	0.00352782	0.0296709
Others	Ybt1	189 kDa	0	0	0	0	0	0.001	0.001	0
Others	Ioc4	55 kDa	1	3	2	0.0181818	0.0545455	0.00421004	0.0128926	1.61463
Others	Met30	73 kDa	0	2	1	0	0.0273973	0.001	0.00647572	2.69504
Others	YBL086C	52 kDa	1	0	0.5	0.0192308	0	0.00445293	0.001	-2.15475
Others	Psa1	40 kDa	3	0	1.5	0.075	0	0.0173664	0.001	-4.11823
Others	Mcm3	108 kDa	1	0	0.5	0.00925926	0	0.002144	0.001	-1.10031
Others	YLL032C	95 kDa	2	0	1	0.0210526	0	0.00487478	0.001	-2.28534
Others	Hmi1	81 kDa	2	0	1	0.0246914	0	0.00571734	0.001	-2.51534	Average All Others
	All Others		10.0952	10.9905	10.5429			0.0436952	0.0470191		-0.220869
