# Supplementary material
Source: HighWire-hosted journal article supplement (doi:10.1101/rna.079025.121)
Supplement: Supplemental_File_S2.xlsx [file Supplemental_File_S2.xlsx]

## Sheet: Rio2-Summary
Subcomplex	Protein	Molecular.Weight	RIO2_1	RIO2.AID_1	RIO2_2	RIO2.AID_2	Average SpC	RIO2_1 PPMW	RIO2.AID_1 PPMW	RIO2_2 PPMW	RIO2.AID_2 PPMW	RIO2_1 RSAB	RIO2.AID_1 RSAB	RIO2_2 RSAB	RIO2.AID_2 RSAB	log2FC_1	log2FC_2	Average log2FC	Protein + Avg SpC
90S/pre-40S	Enp1	55 kDa	312	360	495	488	413.75	5.67273	6.54545	9	8.87273	1.5643	1.57576	1.70981	1.65116	0.0105307	-0.0503562	-0.0199128	Enp1 (414)
90S/pre-40S	Pno1	30 kDa	148	183	289	257	219.25	4.93333	6.1	9.63333	8.56667	1.3604	1.46852	1.83013	1.59421	0.110326	-0.19911	-0.0443918	Pno1 (219)
90S/pre-40S	Dim1	36 kDa	224	119	362	131	209	6.22222	3.30556	10.0556	3.63889	1.71582	0.795782	1.91035	0.677176	-1.10846	-1.49623	-1.30234	Dim1 (209)
90S/pre-40S	Rrp12	138 kDa	153	127	183	78	135.25	1.1087	0.92029	1.32609	0.565217	0.305731	0.221551	0.251929	0.105184	-0.464623	-1.26011	-0.862365	Rrp12 (135)
pre-40S	Nob1	52 kDa	172	140	233	163	177	3.30769	2.69231	4.48077	3.13462	0.912121	0.648148	0.851253	0.583333	-0.492902	-0.545267	-0.519084	Nob1 (177)
90S/pre-40S	Slx9	24 kDa	42	25	38	18	30.75	1.75	1.04167	1.58333	0.75	0.482576	0.250772	0.3008	0.139571	-0.944381	-1.10781	-1.0261	Slx9 (31)
90S/pre-40S	Bud23	31 kDa	16	36	11	26	22.25	0.516129	1.16129	0.354839	0.83871	0.142326	0.27957	0.0674119	0.156079	0.974005	1.2112	1.0926	Bud23 (22)
90S/pre-40S	Trm112	15 kDa	9	22	7	20	14.5	0.6	1.46667	0.466667	1.33333	0.165455	0.353086	0.0886569	0.248125	1.09359	1.48476	1.28918	Trm112 (15)
pre-40S	Tsr1	91 kDa	330	378	479	489	419	3.62637	4.15385	5.26374	5.37363	1	1	1	1	0	0	0	Tsr1 (419)
pre-40S	Ltv1	53 kDa	228	264	287	282	265.25	4.30189	4.98113	5.41509	5.32075	1.18628	1.19916	1.02875	0.990161	0.0155839	-0.0551644	-0.0197902	Ltv1 (265)
pre-40S	Hrr25	57 kDa	224	281	331	344	295	3.92982	4.92982	5.80702	6.03509	1.08368	1.18681	1.10321	1.12309	0.131151	0.0257685	0.0784599	Hrr25 (295)
pre-40S	Rio2	49 kDa	303	118	437	94	238	6.18367	2.40816	8.91837	1.91837	1.70519	0.579743	1.6943	0.356997	-1.55645	-2.24671	-1.90158	Rio2 (238)
pre-40S	Rio1	56 kDa	6	45	10	37	24.5	0.107143	0.803571	0.178571	0.660714	0.0295455	0.193452	0.0339248	0.122955	2.71097	1.85772	2.28434	Rio1 (25)
	All SSU Processome		3.97917	5.02083	14.875	7.14583	7.75521					0.0185539	0.0210448	0.043477	0.0246983	-0.106783	-1.93896	-1.02287	All SSU Processome (8)
	All 40S RPs		66.561	72.561	107.537	102.488	87.2866					0.970146	0.932176	1.06026	0.997699	-0.0800456	-0.101867	-0.0909563	All 40S RPs (87)
	All 60S-related		7.9375	11.2812	10.875	13.2969	10.8477					0.0964203	0.113518	0.0881691	0.101019	0.396985	0.118883	0.257934	All 60S-related (11)
	All Others		5.02649	7.13245	9.12583	8.42384	7.42715					0.025922	0.0327743	0.0297303	0.0280739	0.532028	-0.241562	0.145233	All Others (7)

## Sheet: MassSpecData
Subcomplex	Protein	Molecular.Weight	RIO2_1	RIO2.AID_1	RIO2_2	RIO2.AID_2	RIO2_1 PPMW	RIO2.AID_1 PPMW	RIO2_2 PPMW	RIO2.AID_2 PPMW	RIO2_1 RSAB	RIO2.AID_1 RSAB	RIO2_2 RSAB	RIO2.AID_2 RSAB	log2FC_1	log2FC_2
90S-3M=	Nop6	25 kDa	10	10	15	15	0.4	0.4	0.6	0.6	0.110303	0.0962963	0.113987	0.111656	-0.19592	-0.0298088
90S-5	Bfr2	61 kDa	5	4	13	5	0.0819672	0.0655738	0.213115	0.0819672	0.0226031	0.0157863	0.0404874	0.0152536	-0.517848	-1.40832
90S-5	Lcp5	41 kDa	3	2	4	2	0.0731707	0.0487805	0.097561	0.0487805	0.0201774	0.0117435	0.0185345	0.00907776	-0.780883	-1.02981
90S-5	Efg1	27 kDa	0	1	4	8	0	0.037037	0.148148	0.296296	0.001	0.00891632	0.0281451	0.055139	3.15645	0.970191
90S-5	Enp2	82 kDa	0	0	3	2	0	0	0.0365854	0.0243902	0.001	0.001	0.00695046	0.00453888	0	-0.614771
90S-5=	Hca4	87 kDa	30	25	37	24	0.344828	0.287356	0.425287	0.275862	0.0950888	0.0691784	0.0807957	0.0513363	-0.458955	-0.6543
90S-5ETS	Utp7	62 kDa	2	9	5	5	0.0322581	0.145161	0.0806452	0.0806452	0.00889541	0.0349462	0.0153209	0.0150076	1.974	-0.0298088
90S-5ETS	Sas10	70 kDa	0	3	10	3	0	0.0428571	0.142857	0.0428571	0.001	0.0103175	0.0271399	0.00797546	3.36702	-1.76677
90S-5ETS	Fcf2	26 kDa	0	0	2	10	0	0	0.0769231	0.384615	0.001	0.001	0.0146138	0.0715746	0	2.29212		Scaffold 5.0.0
90S-5ETS	Bud21	24 kDa	0	0	4	0	0	0	0.166667	0	0.001	0.001	0.0316632	0.001	0	-4.98473		Total Spectrum Count
90S-C	Krr1	37 kDa	21	23	45	34	0.567568	0.621622	1.21622	0.918919	0.156511	0.14965	0.231056	0.171005	-0.0646757	-0.434199		Protein Threshold 99%
90S-C	Utp22	140 kDa	17	7	53	24	0.121429	0.05	0.378571	0.171429	0.0334848	0.012037	0.0719207	0.0319018	-1.47603	-1.17277		Minimum # peptides 2
90S-C	Rrp5	193 kDa	14	7	62	25	0.0725389	0.0362694	0.321244	0.129534	0.0200031	0.00873153	0.0610296	0.0241054	-1.19592	-1.34015		Peptide Threshold 1% FDR
90S-C=	Kri1	69 kDa	4	4	12	2	0.057971	0.057971	0.173913	0.0289855	0.0159859	0.013956	0.0330398	0.00539403	-0.19592	-2.61477		* All "0" RSAB values were replaced with "0.001"
90S-C=	Mrd1	101 kDa	0	0	17	3	0	0	0.168317	0.029703	0.001	0.001	0.0319767	0.00552755	0	-2.53231
90S-C=	Utp23	29 kDa	0	0	4	0	0	0	0.137931	0	0.001	0.001	0.026204	0.001	0	-4.71172
90S-C= HACA	Gar1	21 kDa	1	2	2	3	0.047619	0.0952381	0.0952381	0.142857	0.0131313	0.0229277	0.0180932	0.0265849	0.80408	0.555154
90S-C= HACA	Cbf5	55 kDa	0	0	8	8	0	0	0.145455	0.145455	0.001	0.001	0.0276333	0.0270682	0	-0.0298088
90S-Helicase	Has1	57 kDa	0	4	10	6	0	0.0701754	0.175439	0.105263	0.001	0.0168941	0.0333297	0.0195888	4.07845	-0.766774
90S-Helicase	Prp43	88 kDa	0	0	18	6	0	0	0.204545	0.0681818	0.001	0.001	0.0388594	0.0126882	0	-1.61477
90S-Helicase	Ecm16	145 kDa	0	0	4	1	0	0	0.0275862	0.00689655	0.001	0.001	0.0052408	0.00128341	0	-2.02981
90S-Late	Bms1	136 kDa	23	69	28	52	0.169118	0.507353	0.205882	0.382353	0.0466355	0.122141	0.0391133	0.0711536	1.38904	0.863276
90S-Late	Rcl1	40 kDa	6	26	15	17	0.15	0.65	0.375	0.425	0.0413636	0.156481	0.0712422	0.07909	1.91956	0.150763
90S-Late	Utp30	32 kDa	2	3	7	9	0.0625	0.09375	0.21875	0.28125	0.0172348	0.0225694	0.0415579	0.052339	0.389042	0.332761
90S-Late	Kre33	119 kDa	6	1	27	5	0.0504202	0.00840336	0.226891	0.0420168	0.0139037	0.00202303	0.0431045	0.00781908	-2.78088	-2.46277
90S-Late	Nop14	94 kDa	1	6	12	1	0.0106383	0.0638298	0.12766	0.0106383	0.00293359	0.0153664	0.0242527	0.00197972	2.38904	-3.61477
90S-Late	Utp14	103 kDa	5	4	10	8	0.0485437	0.038835	0.0970874	0.0776699	0.0133863	0.00934915	0.0184446	0.0144539	-0.517848	-0.351737
90S-Late	Noc4	64 kDa	1	1	6	1	0.015625	0.015625	0.09375	0.015625	0.00430871	0.00376157	0.0178105	0.00290772	-0.19592	-2.61477
90S-Late	Utp20	288 kDa	0	0	12	1	0	0	0.0416667	0.00347222	0.001	0.001	0.0079158	0.00064616	0	-3.61477
90S-MPP10	Mpp10	67 kDa	0	2	17	1	0	0.0298507	0.253731	0.0149254	0.001	0.00718629	0.0482037	0.00277752	2.84525	-4.11727
90S-MPP10	Imp4	33 kDa	0	0	6	0	0	0	0.181818	0	0.001	0.001	0.0345417	0.001	0	-5.11027
90S-U3	Nop1	34 kDa	9	17	27	24	0.264706	0.5	0.794118	0.705882	0.0729947	0.12037	0.150866	0.131361	0.721618	-0.199734
90S-U3	Nop56	57 kDa	3	5	31	11	0.0526316	0.0877193	0.54386	0.192982	0.0145136	0.0211176	0.103322	0.0359129	0.541045	-1.52457
90S-U3	Nop58	57 kDa	3	4	18	9	0.0526316	0.0701754	0.315789	0.157895	0.0145136	0.0168941	0.0599934	0.0293833	0.219117	-1.02981
90S-U3	Snu13	14 kDa	4	1	11	4	0.285714	0.0714286	0.785714	0.285714	0.0787879	0.0171958	0.149269	0.0531697	-2.19592	-1.48924
90S-U3	Rrp9	65 kDa	0	0	3	0	0	0	0.0461538	0	0.001	0.001	0.00876827	0.001	0	-3.13229
90S-UTPA	Utp10	200 kDa	7	0	36	2	0.035	0	0.18	0.01	0.00965152	0.001	0.0341962	0.00186094	-3.27076	-4.19973
90S-UTPA	Utp8	80 kDa	0	0	12	2	0	0	0.15	0.025	0.001	0.001	0.0284969	0.00465235	0	-2.61477
90S-UTPA	Utp9	65 kDa	3	0	10	1	0.0461538	0	0.153846	0.0153846	0.0127273	0.001	0.0292276	0.00286299	-3.66985	-3.35174
90S-UTPA	Utp15	58 kDa	1	0	13	0	0.0172414	0	0.224138	0	0.00475444	0.001	0.0425815	0.001	-2.24928	-5.41216
90S-UTPA	Nan1	101 kDa	0	0	12	0	0	0	0.118812	0	0.001	0.001	0.0225718	0.001	0	-4.49645
90S-UTPA	Utp4	88 kDa	0	0	9	1	0	0	0.102273	0.0113636	0.001	0.001	0.0194297	0.00211471	0	-3.19973
90S-UTPA	Utp5	72 kDa	0	0	6	1	0	0	0.0833333	0.0138889	0.001	0.001	0.0158316	0.00258464	0	-2.61477
90S-UTPB	Pwp2	104 kDa	4	1	14	0	0.0384615	0.00961538	0.134615	0	0.0106061	0.00231481	0.0255741	0.001	-2.19592	-4.67661
90S-UTPB	Utp21	105 kDa	2	0	7	3	0.0190476	0	0.0666667	0.0285714	0.00525253	0.001	0.0126653	0.00531697	-2.39301	-1.2522
90S-UTPB	Utp13	91 kDa	1	0	14	2	0.010989	0	0.153846	0.021978	0.0030303	0.001	0.0292276	0.00408998	-1.59946	-2.83716
90S-UTPB	Dip2	106 kDa	3	0	9	1	0.0283019	0	0.0849057	0.00943396	0.00780446	0.001	0.0161303	0.0017556	-2.9643	-3.19973
90S-UTPB	Utp6	52 kDa	0	0	10	1	0	0	0.192308	0.0192308	0.001	0.001	0.0365344	0.00357873	0	-3.35174
90S/pre-40S	Enp1	55 kDa	312	360	495	488	5.67273	6.54545	9	8.87273	1.5643	1.57576	1.70981	1.65116	0.0105307	-0.0503562
90S/pre-40S	Rrp12	138 kDa	153	127	183	78	1.1087	0.92029	1.32609	0.565217	0.305731	0.221551	0.251929	0.105184	-0.464623	-1.26011
90S/pre-40S	Pno1	30 kDa	148	183	289	257	4.93333	6.1	9.63333	8.56667	1.3604	1.46852	1.83013	1.59421	0.110326	-0.19911
90S/pre-40S	Bud23	31 kDa	16	36	11	26	0.516129	1.16129	0.354839	0.83871	0.142326	0.27957	0.0674119	0.156079	0.974005	1.2112
90S/pre-40S	Dim1	36 kDa	224	119	362	131	6.22222	3.30556	10.0556	3.63889	1.71582	0.795782	1.91035	0.677176	-1.10846	-1.49623
90S/pre-40S	Slx9	24 kDa	42	25	38	18	1.75	1.04167	1.58333	0.75	0.482576	0.250772	0.3008	0.139571	-0.944381	-1.10781
90S/pre-40S	Trm112	15 kDa	9	22	7	20	0.6	1.46667	0.466667	1.33333	0.165455	0.353086	0.0886569	0.248125	1.09359	1.48476
pre-40S	Nob1	52 kDa	172	140	233	163	3.30769	2.69231	4.48077	3.13462	0.912121	0.648148	0.851253	0.583333	-0.492902	-0.545267
pre-40S	Tsr1	91 kDa	330	378	479	489	3.62637	4.15385	5.26374	5.37363	1	1	1	1	0	0
pre-40S	Ltv1	53 kDa	228	264	287	282	4.30189	4.98113	5.41509	5.32075	1.18628	1.19916	1.02875	0.990161	0.0155839	-0.0551644
pre-40S	Hrr25	57 kDa	224	281	331	344	3.92982	4.92982	5.80702	6.03509	1.08368	1.18681	1.10321	1.12309	0.131151	0.0257685
pre-40S	Rio2	49 kDa	303	118	437	94	6.18367	2.40816	8.91837	1.91837	1.70519	0.579743	1.6943	0.356997	-1.55645	-2.24671
pre-40S	Rio1	56 kDa	6	45	10	37	0.107143	0.803571	0.178571	0.660714	0.0295455	0.193452	0.0339248	0.122955	2.71097	1.85772
LSU RP (A)	Rpl4A	39 kDa	31	38	40	37	0.794872	0.974359	1.02564	0.948718	0.219192	0.234568	0.19485	0.176551	0.097811	-0.142284
LSU RP (A)	Rpl3	44 kDa	18	31	29	40	0.409091	0.704545	0.659091	0.909091	0.11281	0.169613	0.125214	0.169176	0.588351	0.434138
LSU RP (A)	Rpp0	34 kDa	18	17	23	23	0.529412	0.5	0.676471	0.676471	0.145989	0.12037	0.128515	0.125887	-0.278382	-0.0298088
LSU RP (A)	Rpl23A	14 kDa	18	19	14	17	1.28571	1.35714	1	1.21429	0.354545	0.32672	0.189979	0.225971	-0.117918	0.250299
LSU RP (A)	Rpl16A	22 kDa	13	17	13	18	0.590909	0.772727	0.590909	0.818182	0.162948	0.186027	0.11226	0.152259	0.191103	0.439676
LSU RP (A)	Rpl30	11 kDa	14	14	17	16	1.27273	1.27273	1.54545	1.45455	0.350964	0.306397	0.293604	0.270682	-0.19592	-0.117272
LSU RP (A)	Rpl17A	21 kDa	10	16	0	0	0.47619	0.761905	0	0	0.131313	0.183422	0.001	0.001	0.482152	0
LSU RP (A)	Rpl12A	18 kDa	14	13	15	18	0.777778	0.722222	0.833333	1	0.214478	0.173868	0.158316	0.186094	-0.302835	0.233226
LSU RP (A)	Rpl6A	20 kDa	10	14	17	20	0.5	0.7	0.85	1	0.137879	0.168519	0.161482	0.186094	0.289507	0.204656
LSU RP (A)	Rpl5	34 kDa	7	9	13	8	0.205882	0.264706	0.382353	0.235294	0.0567736	0.0637255	0.0726391	0.0437868	0.16665	-0.730249
LSU RP (A)	Rpl9A	22 kDa	2	8	9	10	0.0909091	0.363636	0.409091	0.454545	0.0250689	0.0875421	0.0777187	0.0845882	1.80408	0.122194
LSU RP (A)	Rpl21A	18 kDa	5	15	9	12	0.277778	0.833333	0.5	0.666667	0.0765993	0.200617	0.0949896	0.124063	1.38904	0.385229
LSU RP (A)	Rpl1A	24 kDa	5	12	10	10	0.208333	0.5	0.416667	0.416667	0.0574495	0.12037	0.079158	0.0775392	1.06711	-0.0298088
LSU RP (A)	Rpl25	16 kDa	7	12	9	10	0.4375	0.75	0.5625	0.625	0.120644	0.180556	0.106863	0.116309	0.581687	0.122194
LSU RP (A)	Rpl14A	15 kDa	8	7	10	11	0.533333	0.466667	0.666667	0.733333	0.147071	0.112346	0.126653	0.136469	-0.388565	0.107695
LSU RP (A)	Rpl15A	24 kDa	7	13	15	11	0.291667	0.541667	0.625	0.458333	0.0804293	0.130401	0.118737	0.0852931	0.697165	-0.477268
LSU RP (A)	Rpl10	25 kDa	3	14	9	15	0.12	0.56	0.36	0.6	0.0330909	0.134815	0.0683925	0.111656	2.02647	0.707157
LSU RP (A)	Rpl24A	18 kDa	4	7	4	12	0.222222	0.388889	0.222222	0.666667	0.0612795	0.0936214	0.0422176	0.124063	0.611435	1.55515
LSU RP (A)	Rpl31A	13 kDa	5	9	0	0	0.384615	0.692308	0	0	0.106061	0.166667	0.001	0.001	0.652077	0
LSU RP (A)	Rpl18A	21 kDa	6	7	10	8	0.285714	0.333333	0.47619	0.380952	0.0787879	0.0802469	0.0904662	0.070893	0.0264722	-0.351737
LSU RP (A)	Rpl22A	14 kDa	3	4	3	0	0.214286	0.285714	0.214286	0	0.0590909	0.0687831	0.0407098	0.001	0.219117	-5.3473
LSU RP (A)	Rpl28	17 kDa	5	8	6	11	0.294118	0.470588	0.352941	0.647059	0.0811052	0.11329	0.0670515	0.120414	0.482152	0.84466
LSU RP (A)	Rpp2A	11 kDa	5	4	8	6	0.454545	0.363636	0.727273	0.545455	0.125344	0.0875421	0.138167	0.101506	-0.517848	-0.444846
LSU RP (A)	Rpl38	9 kDa	7	4	2	4	0.777778	0.444444	0.222222	0.444444	0.214478	0.106996	0.0422176	0.0827085	-1.00328	0.970191
LSU RP (A)	Rpl11A	20 kDa	0	0	14	16	0	0	0.7	0.8	0.001	0.001	0.132985	0.148875	0	0.162836
LSU RP (A)	Rpl36A	11 kDa	0	0	9	15	0	0	0.818182	1.36364	0.001	0.001	0.155437	0.253765	0	0.707157
LSU RP (A)	Rpl33A	12 kDa	0	0	8	7	0	0	0.666667	0.583333	0.001	0.001	0.126653	0.108555	0	-0.222454
LSU RP (B)	Rpl20B	20 kDa	33	27	30	34	1.65	1.35	1.5	1.7	0.455	0.325	0.284969	0.31636	-0.485427	0.150763
LSU RP (B)	Rpl7B	28 kDa	27	30	36	39	0.964286	1.07143	1.28571	1.39286	0.265909	0.257937	0.244259	0.259202	-0.0439171	0.0856684
LSU RP (B)	Rpl8B	28 kDa	18	21	26	30	0.642857	0.75	0.928571	1.07143	0.177273	0.180556	0.176409	0.199387	0.0264722	0.176642
LSU RP (B)	Rpl13B	23 kDa	13	16	13	20	0.565217	0.695652	0.565217	0.869565	0.155863	0.167472	0.10738	0.161821	0.10364	0.59168
LSU RP (B)	Rpl2B	27 kDa	11	13	14	14	0.407407	0.481481	0.518519	0.518519	0.112346	0.115912	0.0985077	0.0964932	0.0450879	-0.0298088
LSU RP (B)	Rpl16B	22 kDa	9	16	11	21	0.409091	0.727273	0.5	0.954545	0.11281	0.175084	0.0949896	0.177635	0.634155	0.903077
LSU RP (B)	Rpl36B	11 kDa	12	17	0	0	1.09091	1.54545	0	0	0.300826	0.372054	0.001	0.001	0.30658	0
LSU RP (B)	Rpl19B	22 kDa	6	17	10	19	0.272727	0.772727	0.454545	0.863636	0.0752066	0.186027	0.0863541	0.160718	1.30658	0.896191
LSU RP (B)	Rpl6B	20 kDa	10	13	15	16	0.5	0.65	0.75	0.8	0.137879	0.156481	0.142484	0.148875	0.182591	0.0633006
LSU RP (B)	Rpl11B	20 kDa	7	12	0	0	0.35	0.6	0	0	0.0965152	0.144444	0.001	0.001	0.581687	0
LSU RP (B)	Rpl35B	14 kDa	3	13	12	14	0.214286	0.928571	0.857143	1	0.0590909	0.223545	0.162839	0.186094	1.91956	0.192584
LSU RP (B)	Rpl27B	16 kDa	8	14	12	10	0.5	0.875	0.75	0.625	0.137879	0.210648	0.142484	0.116309	0.611435	-0.292843
LSU RP (B)	Rpp2B	11 kDa	8	5	10	6	0.727273	0.454545	0.909091	0.545455	0.200551	0.109428	0.172708	0.101506	-0.873992	-0.766774
LSU RP (B)	Rpl26B	14 kDa	6	7	8	11	0.428571	0.5	0.571429	0.785714	0.118182	0.12037	0.108559	0.146217	0.0264722	0.429623
LSU RP (B)	Rpl43B	10 kDa	3	4	0	0	0.3	0.4	0	0	0.0827273	0.0962963	0.001	0.001	0.219117	0
LSU RP (B)	Rpl17B	21 kDa	0	0	13	15	0	0	0.619048	0.714286	0.001	0.001	0.117606	0.132924	0	0.176642
LSU RP (B)	Rpl31B	13 kDa	0	0	17	16	0	0	1.30769	1.23077	0.001	0.001	0.248434	0.229039	0	-0.117272
pre-60S	Nop12	52 kDa	39	69	57	72	0.75	1.32692	1.09615	1.38462	0.206818	0.319444	0.208246	0.257669	0.627202	0.307226
pre-60S	Dbp2	61 kDa	16	72	16	82	0.262295	1.18033	0.262295	1.34426	0.0723299	0.284153	0.0498306	0.250159	1.974	2.32774
pre-60S	Mex67	67 kDa	29	6	25	5	0.432836	0.0895522	0.373134	0.0746269	0.119358	0.0215589	0.0708877	0.0138876	-2.46894	-2.35174
pre-60S	Drs1	85 kDa	12	5	4	2	0.141176	0.0588235	0.0470588	0.0235294	0.0389305	0.0141612	0.00894019	0.00437868	-1.45895	-1.02981
pre-60S	Nug1	58 kDa	0	8	3	16	0	0.137931	0.0517241	0.275862	0.001	0.0332056	0.00982651	0.0513363	5.05336	2.38523
pre-60S	Dbp9	68 kDa	4	7	5	5	0.0588235	0.102941	0.0735294	0.0735294	0.016221	0.0247821	0.0139691	0.0136834	0.611435	-0.0298088
pre-60S	Nop4	78 kDa	1	2	3	3	0.0128205	0.025641	0.0384615	0.0384615	0.00353535	0.00617284	0.00730689	0.00715746	0.80408	-0.0298088
pre-60S	Rat1	116 kDa	1	3	0	7	0.00862069	0.0258621	0	0.0603448	0.00237722	0.00622605	0.001	0.0112298	1.38904	3.48926
pre-60S	Rex4	33 kDa	0	6	4	5	0	0.181818	0.121212	0.151515	0.001	0.043771	0.0230278	0.0281961	5.4519	0.292119
pre-60S	Nog1	74 kDa	0	1	2	4	0	0.0135135	0.027027	0.0540541	0.001	0.00325325	0.00513457	0.0100591	1.70188	0.970191
pre-60S	Ebp2	50 kDa	4	2	3	2	0.08	0.04	0.06	0.04	0.0220606	0.00962963	0.0113987	0.00744376	-1.19592	-0.614771
pre-60S	Tif6	26 kDa	3	0	2	0	0.115385	0	0.0769231	0	0.0318182	0.001	0.0146138	0.001	-4.99178	-3.86926
pre-60S	Rpf1	35 kDa	0	4	0	0	0	0.114286	0	0	0.001	0.0275132	0.001	0.001	4.78205	0
pre-60S	Brx1	34 kDa	0	0	8	6	0	0	0.235294	0.176471	0.001	0.001	0.044701	0.0328401	0	-0.444846
pre-60S	Mdn1	559 kDa	0	0	10	9	0	0	0.0178891	0.0161002	0.001	0.001	0.00339855	0.00299615	0	-0.181812
pre-60S	Noc2	82 kDa	0	0	4	2	0	0	0.0487805	0.0243902	0.001	0.001	0.00926727	0.00453888	0	-1.02981
pre-60S	Nop7	70 kDa	0	0	3	4	0	0	0.0428571	0.0571429	0.001	0.001	0.00814196	0.0106339	0	0.385229
pre-60S	Arx1	65 kDa	0	0	0	2	0	0	0	0.0307692	0.001	0.001	0.001	0.00572597	0	2.51752
pre-60S	Rrp17	28 kDa	0	0	0	4	0	0	0	0.142857	0.001	0.001	0.001	0.0265849	0	4.73253
pre-60S	Pwp1	64 kDa	0	0	4	1	0	0	0.0625	0.015625	0.001	0.001	0.0118737	0.00290772	0	-2.02981
SSU RP (A)	Rps3	27 kDa	149	168	232	216	5.51852	6.22222	8.59259	8	1.52177	1.49794	1.63241	1.48875	-0.0227713	-0.132902
SSU RP (A)	Rps1A	29 kDa	143	161	249	232	4.93103	5.55172	8.58621	8	1.35977	1.33653	1.6312	1.48875	-0.0248747	-0.13183
SSU RP (A)	Rps4A	29 kDa	118	144	191	194	4.06897	4.96552	6.58621	6.68966	1.12205	1.1954	1.25124	1.24491	0.0913617	-0.0073248
SSU RP (A)	Rps18A	17 kDa	130	129	193	177	7.64706	7.58824	11.3529	10.4118	2.10873	1.8268	2.15682	1.93757	-0.207061	-0.15466
SSU RP (A)	Rps0A	28 kDa	125	106	186	186	4.46429	3.78571	6.64286	6.64286	1.23106	0.911376	1.262	1.2362	-0.433784	-0.0298088
SSU RP (A)	Asc1	35 kDa	86	112	152	147	2.45714	3.2	4.34286	4.2	0.677576	0.77037	0.825052	0.781595	0.18517	-0.078064
SSU RP (A)	Rps5	25 kDa	95	104	145	128	3.8	4.16	5.8	5.12	1.04788	1.00148	1.10188	0.952802	-0.0653361	-0.209718
SSU RP (A)	Rps13	17 kDa	87	95	124	109	5.11765	5.58824	7.29412	6.41176	1.41123	1.34532	1.38573	1.19319	-0.0690081	-0.215821
SSU RP (A)	Rps12	15 kDa	77	88	123	97	5.13333	5.86667	8.2	6.46667	1.41556	1.41235	1.55783	1.20341	-0.00327513	-0.37241
SSU RP (A)	Rps2	27 kDa	65	75	114	99	2.40741	2.77778	4.22222	3.66667	0.663861	0.668724	0.802134	0.682345	0.0105307	-0.233342
SSU RP (A)	Rps7A	22 kDa	73	80	167	180	3.31818	3.63636	7.59091	8.18182	0.915014	0.875421	1.44211	1.52259	-0.0638167	0.07834
SSU RP (A)	Rps17A	16 kDa	72	85	109	120	4.5	5.3125	6.8125	7.5	1.24091	1.27894	1.29423	1.39571	0.0435457	0.108897
SSU RP (A)	Rps24A	15 kDa	61	74	112	105	4.06667	4.93333	7.46667	7	1.12141	1.18765	1.41851	1.30266	0.0827958	-0.122918
SSU RP (A)	Rps9A	22 kDa	71	72	130	131	3.22727	3.27273	5.90909	5.95455	0.889945	0.787879	1.1226	1.10811	-0.175742	-0.0187536
SSU RP (A)	Rps15	16 kDa	63	80	97	94	3.9375	5	6.0625	5.875	1.0858	1.2037	1.15175	1.0933	0.148728	-0.0751328
SSU RP (A)	Rps20	14 kDa	57	61	94	104	4.07143	4.35714	6.71429	7.42857	1.12273	1.04894	1.27557	1.38241	-0.0980729	0.116042
SSU RP (A)	Rps25A	12 kDa	35	35	45	38	2.91667	2.91667	3.75	3.16667	0.804293	0.70216	0.712422	0.589298	-0.19592	-0.273734
SSU RP (A)	Rps28A	8 kDa	25	37	47	53	3.125	4.625	5.875	6.625	0.861742	1.11343	1.11613	1.23287	0.369677	0.143523
SSU RP (A)	Rps29A	7 kDa	29	38	30	37	4.14286	5.42857	4.28571	5.28571	1.14242	1.30688	0.814196	0.98364	0.194026	0.272754
SSU RP (A)	Rps31	17 kDa	27	30	34	19	1.58824	1.76471	2	1.11765	0.437968	0.424837	0.379958	0.207987	-0.0439171	-0.869344
SSU RP (A)	Rps27A	9 kDa	21	19	0	0	2.33333	2.11111	0	0	0.643434	0.50823	0.001	0.001	-0.34031	0
SSU RP (A)	Rps10A	13 kDa	14	7	12	10	1.07692	0.538462	0.923077	0.769231	0.29697	0.12963	0.175365	0.143149	-1.19592	-0.292843
SSU RP (A)	Rps19A	16 kDa	0	0	146	146	0	0	9.125	9.125	0.001	0.001	1.73356	1.69811	0	-0.0298088
SSU RP (A)	Rps21A	10 kDa	0	0	78	81	0	0	7.8	8.1	0.001	0.001	1.48184	1.50736	0	0.024639
SSU RP (B)	Rps1B	29 kDa	145	167	249	235	5	5.75862	8.58621	8.10345	1.37879	1.38633	1.6312	1.508	0.00787499	-0.113294
SSU RP (B)	Rps14B	15 kDa	123	120	155	148	8.2	8	10.3333	9.86667	2.26121	1.92593	1.96312	1.83613	-0.231544	-0.0964798
SSU RP (B)	Rps19B	16 kDa	101	104	0	0	6.3125	6.5	0	0	1.74072	1.56481	0.001	0.001	-0.153692	0
SSU RP (B)	Rps6B	27 kDa	89	104	136	125	3.2963	3.85185	5.03704	4.62963	0.908979	0.927298	0.956932	0.861547	0.0287861	-0.151487
SSU RP (B)	Rps9B	22 kDa	86	98	174	175	3.90909	4.45455	7.90909	7.95455	1.07796	1.07239	1.50256	1.48029	-0.00747512	-0.0215412
SSU RP (B)	Rps16B	16 kDa	80	94	132	125	5	5.875	8.25	7.8125	1.37879	1.41435	1.56733	1.45386	0.0367405	-0.108419
SSU RP (B)	Rps22B	15 kDa	59	72	127	103	3.93333	4.8	8.46667	6.86667	1.08465	1.15556	1.60849	1.27785	0.0913617	-0.331993
SSU RP (B)	Rps7B	22 kDa	88	72	140	125	4	3.27273	6.36364	5.68182	1.10303	0.787879	1.20896	1.05735	-0.485427	-0.193308
SSU RP (B)	Rps11B	18 kDa	60	62	85	77	3.33333	3.44444	4.72222	4.27778	0.919192	0.829218	0.897124	0.796069	-0.148614	-0.172413
SSU RP (B)	Rps8B	22 kDa	55	63	101	88	2.5	2.86364	4.59091	4	0.689394	0.689394	0.872177	0.744376	-2.09296e-12	-0.228589
SSU RP (B)	Rps21B	10 kDa	40	50	0	0	4	5	0	0	1.10303	1.2037	0.001	0.001	0.126008	0
SSU RP (B)	Rps29B	7 kDa	20	22	16	19	2.85714	3.14286	2.28571	2.71429	0.787879	0.756614	0.434238	0.505112	-0.0584167	0.218119
SSU RP (B)	Rps30B	7 kDa	14	20	23	23	2	2.85714	3.28571	3.28571	0.551515	0.687831	0.624217	0.611452	0.318653	-0.0298088
SSU RP (B)	Rps23B	16 kDa	17	17	33	35	1.0625	1.0625	2.0625	2.1875	0.292992	0.255787	0.391832	0.407081	-0.19592	0.0550801
SSU RP (B)	Rps26B	13 kDa	9	8	12	9	0.692308	0.615385	0.923077	0.692308	0.190909	0.148148	0.175365	0.128834	-0.365845	-0.444846
SSU RP (B)	Rps27B	9 kDa	0	0	31	32	0	0	3.44444	3.55556	0.001	0.001	0.654373	0.661668	0	0.0159949
SSU RP (B)	Rps0B	28 kDa	120	102	185	180	4.28571	3.64286	6.60714	6.42857	1.18182	0.876984	1.25522	1.19632	-0.430385	-0.0693372
Others	Dis3	114 kDa	0	0	2	1	0	0	0.0175439	0.00877193	0.001	0.001	0.00333297	0.0016324	0	-1.02981
Others	Trf5	74 kDa	0	0	3	0	0	0	0.0405405	0	0.001	0.001	0.00770186	0.001	0	-2.94521
Others	Ssb2	67 kDa	76	100	115	110	1.13433	1.49254	1.71642	1.64179	0.3128	0.359315	0.326084	0.305528	0.200008	-0.0939391
Others	Ssa1	70 kDa	65	100	120	109	0.928571	1.42857	1.71429	1.55714	0.256061	0.343915	0.325678	0.289775	0.425568	-0.168515
Others	Ssb1	67 kDa	72	95	115	106	1.07463	1.41791	1.71642	1.58209	0.296336	0.341349	0.326084	0.294417	0.20401	-0.147378
Others	Ssa2	69 kDa	70	93	122	111	1.01449	1.34783	1.76812	1.6087	0.279754	0.324477	0.335905	0.299369	0.213956	-0.16613
Others	TY1B-ER1	199 kDa	52	33	0	0	0.261307	0.165829	0	0	0.0720573	0.0399218	0.001	0.001	-0.851966	0
Others	YGR054W	71 kDa	36	41	63	55	0.507042	0.577465	0.887324	0.774648	0.139821	0.139019	0.168573	0.144157	-0.00829321	-0.225729
Others	Otu2	36 kDa	38	45	31	34	1.05556	1.25	0.861111	0.944444	0.291077	0.300926	0.163593	0.175756	0.0480054	0.103458
Others	Pus4	45 kDa	36	39	33	35	0.8	0.866667	0.733333	0.777778	0.220606	0.208642	0.139318	0.14474	-0.080443	0.0550801
Others	Sro9	48 kDa	25	18	38	28	0.520833	0.375	0.791667	0.583333	0.143624	0.0902778	0.1504	0.108555	-0.669851	-0.470381
Others	Tma64	64 kDa	5	43	19	37	0.078125	0.671875	0.296875	0.578125	0.0215436	0.161748	0.0564001	0.107586	2.90842	0.931717
Others	Yra1	25 kDa	10	25	14	22	0.4	1	0.56	0.88	0.110303	0.240741	0.106388	0.163763	1.12601	0.622268
Others	Tef1	50 kDa	13	17	20	17	0.26	0.34	0.4	0.34	0.071697	0.0818519	0.0759916	0.063272	0.191103	-0.264274
Others	Pab1	64 kDa	19	35	34	43	0.296875	0.546875	0.53125	0.671875	0.0818655	0.131655	0.100926	0.125032	0.685435	0.308993
Others	Sui3	32 kDa	11	19	24	18	0.34375	0.59375	0.75	0.5625	0.0947917	0.14294	0.142484	0.104678	0.592576	-0.444846
Others	Ded1	66 kDa	12	20	10	16	0.181818	0.30303	0.151515	0.242424	0.0501377	0.0729517	0.0287847	0.0451137	0.541045	0.648263
Others	Pdc1	61 kDa	6	5	13	11	0.0983607	0.0819672	0.213115	0.180328	0.0271237	0.0197328	0.0404874	0.0335579	-0.458955	-0.270817
Others	Rtt107	123 kDa	3	41	2	47	0.0243902	0.333333	0.0162602	0.382114	0.00672579	0.0802469	0.00308909	0.0711091	3.57667	4.52478
Others	Imd3	57 kDa	16	9	25	5	0.280702	0.157895	0.438596	0.0877193	0.0774056	0.0380117	0.0833242	0.016324	-1.026	-2.35174
Others	Sse1	77 kDa	3	15	23	20	0.038961	0.194805	0.298701	0.25974	0.0107438	0.0468975	0.056747	0.0483361	2.12601	-0.231443
Others	Stm1	30 kDa	10	11	10	11	0.333333	0.366667	0.333333	0.366667	0.0919192	0.0882716	0.0633264	0.0682345	-0.0584167	0.107695
Others	Tdh3	36 kDa	6	12	12	11	0.166667	0.333333	0.333333	0.305556	0.0459596	0.0802469	0.0633264	0.0568621	0.80408	-0.15534
Others	Fas1	229 kDa	10	9	10	7	0.0436681	0.0393013	0.0436681	0.0305677	0.0120418	0.00946143	0.00829603	0.00568847	-0.347923	-0.544382
Others	Pbp1	79 kDa	4	4	16	22	0.0506329	0.0506329	0.202532	0.278481	0.0139624	0.0121894	0.0384768	0.0518237	-0.19592	0.429623
Others	Htb2	14 kDa	9	11	8	10	0.642857	0.785714	0.571429	0.714286	0.177273	0.189153	0.108559	0.132924	0.0935864	0.292119
Others	Hta2	14 kDa	8	11	0	0	0.571429	0.785714	0	0	0.157576	0.189153	0.001	0.001	0.263511	0
Others	Ssc1	71 kDa	3	11	22	17	0.0422535	0.15493	0.309859	0.239437	0.0116517	0.0372979	0.0588668	0.0445577	1.67855	-0.401778
Others	Cdc19	55 kDa	12	5	11	12	0.218182	0.0909091	0.2	0.218182	0.0601653	0.0218855	0.0379958	0.0406023	-1.45895	0.0957221
Others	Gcd11	58 kDa	6	9	17	15	0.103448	0.155172	0.293103	0.258621	0.0285266	0.0373563	0.0556835	0.0481278	0.389042	-0.210381
Others	Pbp4	20 kDa	4	7	7	12	0.2	0.35	0.35	0.6	0.0551515	0.0842593	0.0664927	0.111656	0.611435	0.747799
Others	Htz1	14 kDa	6	11	6	8	0.428571	0.785714	0.428571	0.571429	0.118182	0.189153	0.0814196	0.106339	0.678549	0.385229
Others	Pgk1	45 kDa	0	1	5	4	0	0.0222222	0.111111	0.0888889	0.001	0.00534979	0.0211088	0.0165417	2.41948	-0.351737
Others	Fas2	207 kDa	5	3	10	6	0.0241546	0.0144928	0.0483092	0.0289855	0.00666081	0.003489	0.00917774	0.00539403	-0.932886	-0.766774
Others	Yef3	116 kDa	7	2	2	4	0.0603448	0.0172414	0.0172414	0.0344828	0.0166405	0.0041507	0.0032755	0.00641704	-2.00328	0.970191
Others	Mtr2	21 kDa	7	3	6	0	0.333333	0.142857	0.285714	0	0.0919192	0.0343915	0.0542797	0.001	-1.41831	-5.76234
Others	Hhf1	11 kDa	3	5	6	4	0.272727	0.454545	0.545455	0.363636	0.0752066	0.109428	0.103625	0.0676706	0.541045	-0.614771
Others	Adh1	37 kDa	3	1	7	4	0.0810811	0.027027	0.189189	0.108108	0.0223587	0.00650651	0.035942	0.0201183	-1.78088	-0.837164
Others	Nat1	99 kDa	3	7	12	11	0.030303	0.0707071	0.121212	0.111111	0.00835629	0.0170221	0.0230278	0.0206771	1.02647	-0.15534
Others	Hsc82	81 kDa	3	3	4	4	0.037037	0.037037	0.0493827	0.0493827	0.0102132	0.00891632	0.00938169	0.00918983	-0.19592	-0.0298088
Others	Lhp1	32 kDa	3	2	9	3	0.09375	0.0625	0.28125	0.09375	0.0258523	0.0150463	0.0534316	0.0174463	-0.780883	-1.61477
Others	Eno2	47 kDa	2	4	7	3	0.0425532	0.0851064	0.148936	0.0638298	0.0117344	0.0204886	0.0282948	0.0118783	0.80408	-1.2522
Others	Mhp1	155 kDa	3	6	3	2	0.0193548	0.0387097	0.0193548	0.0129032	0.00533724	0.009319	0.00367702	0.00240121	0.80408	-0.614771
Others	Hsp60	61 kDa	4	6	3	1	0.0655738	0.0983607	0.0491803	0.0163934	0.0180825	0.0236794	0.00934324	0.00305072	0.389042	-1.61477
Others	Mrx1	80 kDa	1	5	0	0	0.0125	0.0625	0	0	0.00344697	0.0150463	0.001	0.001	2.12601	0
Others	Tif1	45 kDa	3	0	2	0	0.0666667	0	0.0444444	0	0.0183838	0.001	0.00844352	0.001	-4.20037	-3.07784
Others	Act1	42 kDa	0	2	0	0	0	0.047619	0	0	0.001	0.0114638	0.001	0.001	3.51902	0
Others	Mss116	76 kDa	1	4	7	3	0.0131579	0.0526316	0.0921053	0.0394737	0.00362839	0.0126706	0.0174981	0.00734582	1.80408	-1.2522
Others	Mud2	60 kDa	1	9	0	13	0.0166667	0.15	0	0.216667	0.00459596	0.0361111	0.001	0.0403204	2.974	5.33344
Others	Her1	139 kDa	2	3	0	0	0.0143885	0.0215827	0	0	0.00396773	0.00519584	0.001	0.001	0.389042	0
Others	Fun12	112 kDa	0	5	0	0	0	0.0446429	0	0	0.001	0.0107474	0.001	0.001	3.42591	0
Others	Sui2	35 kDa	2	5	8	8	0.0571429	0.142857	0.228571	0.228571	0.0157576	0.0343915	0.0434238	0.0425358	1.12601	-0.0298088
Others	Eft1	93 kDa	3	1	5	2	0.0322581	0.0107527	0.0537634	0.0215054	0.00889541	0.00258861	0.0102139	0.00400202	-1.78088	-1.35174
Others	Xrn1	175 kDa	6	1	11	7	0.0342857	0.00571429	0.0628571	0.04	0.00945455	0.00137566	0.0119415	0.00744376	-2.78088	-0.681886
Others	Lsm12	21 kDa	0	1	8	7	0	0.047619	0.380952	0.333333	0.001	0.0114638	0.072373	0.0620314	3.51902	-0.222454
Others	Fba1	40 kDa	0	2	0	0	0	0.05	0	0	0.001	0.012037	0.001	0.001	3.58941	0
Others	Air1	42 kDa	0	7	0	5	0	0.166667	0	0.119048	0.001	0.0401235	0.001	0.0221541	5.32637	4.4695
Others	YPR117W	286 kDa	3	4	0	0	0.0104895	0.013986	0	0	0.00289256	0.003367	0.001	0.001	0.219117	0
Others	Rny1	50 kDa	1	1	1	1	0.02	0.02	0.02	0.02	0.00551515	0.00481481	0.00379958	0.00372188	-0.19592	-0.0298088
Others	His1	32 kDa	3	1	8	6	0.09375	0.03125	0.25	0.1875	0.0258523	0.00752315	0.0474948	0.0348926	-1.78088	-0.444846
Others	MRpl22	35 kDa	0	4	2	6	0	0.114286	0.0571429	0.171429	0.001	0.0275132	0.0108559	0.0319018	4.78205	1.55515
Others	Mis1	106 kDa	0	1	0	0	0	0.00943396	0	0	0.001	0.00227114	0.001	0.001	1.18342	0
Others	Coq2	41 kDa	0	4	0	0	0	0.097561	0	0	0.001	0.0234869	0.001	0.001	4.55378	0
Others	YGR250C	90 kDa	3	2	0	0	0.0333333	0.0222222	0	0	0.00919192	0.00534979	0.001	0.001	-0.780883	0
Others	Tea1	87 kDa	1	4	0	0	0.0114943	0.045977	0	0	0.00316963	0.0110685	0.001	0.001	1.80408	0
Others	Irc5	97 kDa	5	2	4	4	0.0515464	0.0206186	0.0412371	0.0412371	0.0142143	0.00496373	0.00783419	0.00767398	-1.51785	-0.0298088
Others	Ism1	116 kDa	2	3	8	10	0.0172414	0.0258621	0.0689655	0.0862069	0.00475444	0.00622605	0.013102	0.0160426	0.389042	0.292119
Others	Sec7	227 kDa	0	1	0	0	0	0.00440529	0	0	0.001	0.00106053	0.001	0.001	0.084788	0
Others	Gip4	87 kDa	0	6	0	0	0	0.0689655	0	0	0.001	0.0166028	0.001	0.001	4.05336	0
Others	Sir1	77 kDa	0	0	7	6	0	0	0.0909091	0.0779221	0.001	0.001	0.0172708	0.0145008	0	-0.252201
Others	Msl5	53 kDa	0	6	1	10	0	0.113208	0.0188679	0.188679	0.001	0.0272537	0.00358451	0.0351121	4.76838	3.29212
Others	Dyn1	471 kDa	3	0	0	0	0.00636943	0	0	0	0.00175642	0.001	0.001	0.001	-0.812636	0
Others	Pmc1	131 kDa	2	3	3	2	0.0152672	0.0229008	0.0229008	0.0152672	0.00421004	0.00551315	0.00435067	0.00284113	0.389042	-0.614771
Others	Hsp104	102 kDa	1	4	0	0	0.00980392	0.0392157	0	0	0.00270351	0.00944081	0.001	0.001	1.80408	0
Others	Rad18	55 kDa	1	1	0	0	0.0181818	0.0181818	0	0	0.00501377	0.0043771	0.001	0.001	-0.19592	0
Others	Snf2	194 kDa	4	1	11	2	0.0206186	0.00515464	0.056701	0.0103093	0.00568572	0.00124093	0.010772	0.0019185	-2.19592	-2.48924
Others	Nop13	46 kDa	0	3	8	8	0	0.0652174	0.173913	0.173913	0.001	0.0157005	0.0330398	0.0323642	3.97274	-0.0298088
Others	Sen1	253 kDa	4	0	5	5	0.0158103	0	0.0197628	0.0197628	0.0043598	0.001	0.00375453	0.00367775	-2.12426	-0.0298088
Others	Rod1	92 kDa	0	4	0	0	0	0.0434783	0	0	0.001	0.010467	0.001	0.001	3.38777	0
Others	Drs2	154 kDa	0	1	0	0	0	0.00649351	0	0	0.001	0.00156325	0.001	0.001	0.64455	0
Others	Gpm1	28 kDa	0	1	0	0	0	0.0357143	0	0	0.001	0.00859788	0.001	0.001	3.10398	0
Others	Pan2	127 kDa	1	4	0	0	0.00787402	0.0314961	0	0	0.00217132	0.00758239	0.001	0.001	1.80408	0
Others	YHR127W	27 kDa	0	3	2	7	0	0.111111	0.0740741	0.259259	0.001	0.026749	0.0140725	0.0482466	4.74141	1.77755
Others	Rai1	45 kDa	0	4	4	11	0	0.0888889	0.0888889	0.244444	0.001	0.0213992	0.016887	0.0454897	4.41948	1.42962
Others	Net1	129 kDa	1	0	0	0	0.00775194	0	0	0	0.00213766	0.001	0.001	0.001	-1.09603	0
Others	Yta6	85 kDa	1	2	0	0	0.0117647	0.0235294	0	0	0.00324421	0.00566449	0.001	0.001	0.80408	0
Others	Ssk2	181 kDa	1	0	0	0	0.00552486	0	0	0	0.00152352	0.001	0.001	0.001	-0.607411	0
Others	Sgs1	164 kDa	1	2	0	0	0.00609756	0.0121951	0	0	0.00168145	0.00293586	0.001	0.001	0.80408	0
Others	Cti6	57 kDa	1	0	0	0	0.0175439	0	0	0	0.00483785	0.001	0.001	0.001	-2.27437	0
Others	Ssk1	79 kDa	2	2	0	0	0.0253165	0.0253165	0	0	0.0069812	0.0060947	0.001	0.001	-0.19592	0
Others	Rap1	92 kDa	0	0	6	2	0	0	0.0652174	0.0217391	0.001	0.001	0.0123899	0.00404552	0	-1.61477
Others	Pap2	66 kDa	0	4	0	0	0	0.0606061	0	0	0.001	0.0145903	0.001	0.001	3.86694	0
Others	Pfk1	108 kDa	2	1	0	0	0.0185185	0.00925926	0	0	0.00510662	0.00222908	0.001	0.001	-1.19592	0
Others	Thp1	53 kDa	0	1	0	0	0	0.0188679	0	0	0.001	0.00454228	0.001	0.001	2.18342	0
Others	Itt1	54 kDa	0	1	0	0	0	0.0185185	0	0	0.001	0.00445816	0.001	0.001	2.15645	0
Others	Prp28	67 kDa	0	2	0	0	0	0.0298507	0	0	0.001	0.00718629	0.001	0.001	2.84525	0
Others	Ybt1	189 kDa	2	2	0	0	0.010582	0.010582	0	0	0.00291807	0.00254752	0.001	0.001	-0.19592	0
Others	Ioc4	55 kDa	0	1	0	0	0	0.0181818	0	0	0.001	0.0043771	0.001	0.001	2.12998	0
Others	Met30	73 kDa	0	1	0	0	0	0.0136986	0	0	0.001	0.00329782	0.001	0.001	1.72151	0
Others	YBL086C	52 kDa	0	2	0	0	0	0.0384615	0	0	0.001	0.00925926	0.001	0.001	3.2109	0
Others	Est2	103 kDa	2	1	0	0	0.0194175	0.00970874	0	0	0.00535452	0.00233729	0.001	0.001	-1.19592	0
Others	Msc3	81 kDa	2	1	0	0	0.0246914	0.0123457	0	0	0.00680883	0.00297211	0.001	0.001	-1.19592	0
Others	Mcm3	108 kDa	0	2	0	0	0	0.0185185	0	0	0.001	0.00445816	0.001	0.001	2.15645	0
Others	Mdm30	71 kDa	2	2	0	0	0.028169	0.028169	0	0	0.00776782	0.00678143	0.001	0.001	-0.19592	0
Others	TY1B-ML2	199 kDa	0	0	64	26	0	0	0.321608	0.130653	0.001	0.001	0.0610988	0.0243138	0	-1.32937
Others	Ura2	245 kDa	0	0	2	5	0	0	0.00816327	0.0204082	0.001	0.001	0.00155085	0.00379784	0	1.29212
Others	Rqc2	119 kDa	0	0	13	10	0	0	0.109244	0.0840336	0.001	0.001	0.020754	0.0156382	0	-0.40832
Others	Kar2	74 kDa	0	0	11	8	0	0	0.148649	0.108108	0.001	0.001	0.0282401	0.0201183	0	-0.48924
Others	Kap123	123 kDa	0	0	5	4	0	0	0.0406504	0.0325203	0.001	0.001	0.00772273	0.00605184	0	-0.351737
Others	Eno1	47 kDa	0	0	5	2	0	0	0.106383	0.0425532	0.001	0.001	0.0202105	0.0079189	0	-1.35174
Others	Jem1	75 kDa	0	0	5	3	0	0	0.0666667	0.04	0.001	0.001	0.0126653	0.00744376	0	-0.766774
Others	Hsp26	24 kDa	0	0	3	3	0	0	0.125	0.125	0.001	0.001	0.0237474	0.0232618	0	-0.0298088
Others	Spo75	102 kDa	0	0	4	3	0	0	0.0392157	0.0294118	0.001	0.001	0.00745016	0.00547335	0	-0.444846
Others	Bem2	245 kDa	0	0	10	6	0	0	0.0408163	0.0244898	0.001	0.001	0.00775425	0.00455741	0	-0.766774
Others	Sqs1	87 kDa	0	0	8	4	0	0	0.091954	0.045977	0.001	0.001	0.0174693	0.00855605	0	-1.02981
Others	Elp2	89 kDa	0	0	3	2	0	0	0.0337079	0.0224719	0.001	0.001	0.00640379	0.00418189	0	-0.614771
Others	YDR514C	55 kDa	0	0	2	2	0	0	0.0363636	0.0363636	0.001	0.001	0.00690833	0.00676706	0	-0.0298088
Others	Pus7	77 kDa	0	0	3	4	0	0	0.038961	0.0519481	0.001	0.001	0.00740178	0.00966722	0	0.385229
Others	Esl1	129 kDa	0	0	4	2	0	0	0.0310078	0.0155039	0.001	0.001	0.00589083	0.00288518	0	-1.02981
Others	Mtc4	79 kDa	0	0	0	1	0	0	0	0.0126582	0.001	0.001	0.001	0.00235562	0	1.23611
Others	Ira1	351 kDa	0	0	5	6	0	0	0.014245	0.017094	0.001	0.001	0.00270626	0.0031811	0	0.233226
Others	Myo2	181 kDa	0	0	6	3	0	0	0.0331492	0.0165746	0.001	0.001	0.00629765	0.00308443	0	-1.02981
Others	Tra1	433 kDa	0	0	8	4	0	0	0.0184758	0.00923788	0.001	0.001	0.00351001	0.00171911	0	-1.02981
Others	Pma2	102 kDa	0	0	5	2	0	0	0.0490196	0.0196078	0.001	0.001	0.0093127	0.0036489	0	-1.35174
Others	Mbr1	37 kDa	0	0	3	2	0	0	0.0810811	0.0540541	0.001	0.001	0.0154037	0.0100591	0	-0.614771
Others	Sap185	121 kDa	0	0	3	1	0	0	0.0247934	0.00826446	0.001	0.001	0.00471023	0.00153797	0	-1.61477
Others	Smc1	141 kDa	0	0	4	4	0	0	0.0283688	0.0283688	0.001	0.001	0.00538948	0.00527926	0	-0.0298088
Others	Sec21	105 kDa	0	0	4	1	0	0	0.0380952	0.00952381	0.001	0.001	0.0072373	0.00177232	0	-2.02981
Others	Gal3	58 kDa	0	0	6	1	0	0	0.103448	0.0172414	0.001	0.001	0.019653	0.00320852	0	-2.61477
Others	Gde1	138 kDa	0	0	0	6	0	0	0	0.0434783	0.001	0.001	0.001	0.00809105	0	3.01633
Others	Arp9	53 kDa	0	0	6	0	0	0	0.113208	0	0.001	0.001	0.0215071	0.001	0	-4.42674
Others	Ard1	28 kDa	0	0	6	0	0	0	0.214286	0	0.001	0.001	0.0407098	0.001	0	-5.3473
Others	Ape2	108 kDa	0	0	2	3	0	0	0.0185185	0.0277778	0.001	0.001	0.00351813	0.00516928	0	0.555154
Others	Ire1	127 kDa	0	0	1	2	0	0	0.00787402	0.015748	0.001	0.001	0.0014959	0.00293062	0	0.970191
Others	Swi3	93 kDa	0	0	4	3	0	0	0.0430108	0.0322581	0.001	0.001	0.00817115	0.00600303	0	-0.444846
Others	Leu2	39 kDa	0	0	5	2	0	0	0.128205	0.0512821	0.001	0.001	0.0243563	0.00954329	0	-1.35174
Others	Ydj1	45 kDa	0	0	4	1	0	0	0.0888889	0.0222222	0.001	0.001	0.016887	0.00413542	0	-2.02981
Others	Rrn10	17 kDa	0	0	0	4	0	0	0	0.235294	0.001	0.001	0.001	0.0437868	0	5.45243
Others	Slu7	45 kDa	0	0	5	0	0	0	0.111111	0	0.001	0.001	0.0211088	0.001	0	-4.39977
Others	Bud3	185 kDa	0	0	2	3	0	0	0.0108108	0.0162162	0.001	0.001	0.00205383	0.00301774	0	0.555154
Others	Spt5	116 kDa	0	0	3	0	0	0	0.0258621	0	0.001	0.001	0.00491325	0.001	0	-2.29668
Others	Smc4	162 kDa	0	0	4	2	0	0	0.0246914	0.0123457	0.001	0.001	0.00469084	0.00229746	0	-1.02981
Others	YOR022C	82 kDa	0	0	3	4	0	0	0.0365854	0.0487805	0.001	0.001	0.00695046	0.00907776	0	0.385229
Others	Tif4631	107 kDa	0	0	3	2	0	0	0.0280374	0.0186916	0.001	0.001	0.00532652	0.00347839	0	-0.614771
Others	Pep1	178 kDa	0	0	3	0	0	0	0.0168539	0	0.001	0.001	0.0032019	0.001	0	-1.67893
Others	Uaf30	26 kDa	0	0	0	5	0	0	0	0.192308	0.001	0.001	0.001	0.0357873	0	5.16138
Others	Ysp2	161 kDa	0	0	2	0	0	0	0.0124224	0	0.001	0.001	0.00235999	0.001	0	-1.23878
Others	Zds2	105 kDa	0	0	1	3	0	0	0.00952381	0.0285714	0.001	0.001	0.00180932	0.00531697	0	1.55515
Others	Nab2	58 kDa	0	0	2	0	0	0	0.0344828	0	0.001	0.001	0.006551	0.001	0	-2.71172
Others	Ubp10	89 kDa	0	0	3	1	0	0	0.0337079	0.011236	0.001	0.001	0.00640379	0.00209094	0	-1.61477
Others	Arp4	55 kDa	0	0	3	1	0	0	0.0545455	0.0181818	0.001	0.001	0.0103625	0.00338353	0	-1.61477

## Sheet: Calculations
Subcomplex	Protein	Molecular.Weight	RIO2_1	RIO2.AID_1	RIO2_2	RIO2.AID_2	Average SpC	RIO2_1 PPMW	RIO2.AID_1 PPMW	RIO2_2 PPMW	RIO2.AID_2 PPMW	RIO2_1 RSAB	RIO2.AID_1 RSAB	RIO2_2 RSAB	RIO2.AID_2 RSAB	log2FC_1	log2FC_2
90S-3M=	Nop6	25 kDa	10	10	15	15	12.5	0.4	0.4	0.6	0.6	0.110303	0.0962963	0.113987	0.111656	-0.19592	-0.0298088
90S-5	Bfr2	61 kDa	5	4	13	5	6.75	0.0819672	0.0655738	0.213115	0.0819672	0.0226031	0.0157863	0.0404874	0.0152536	-0.517848	-1.40832
90S-5	Lcp5	41 kDa	3	2	4	2	2.75	0.0731707	0.0487805	0.097561	0.0487805	0.0201774	0.0117435	0.0185345	0.00907776	-0.780883	-1.02981
90S-5	Efg1	27 kDa	0	1	4	8	3.25	0	0.037037	0.148148	0.296296	0.001	0.00891632	0.0281451	0.055139	3.15645	0.970191
90S-5	Enp2	82 kDa	0	0	3	2	1.25	0	0	0.0365854	0.0243902	0.001	0.001	0.00695046	0.00453888	0	-0.614771
90S-5=	Hca4	87 kDa	30	25	37	24	29	0.344828	0.287356	0.425287	0.275862	0.0950888	0.0691784	0.0807957	0.0513363	-0.458955	-0.6543
90S-5ETS	Utp7	62 kDa	2	9	5	5	5.25	0.0322581	0.145161	0.0806452	0.0806452	0.00889541	0.0349462	0.0153209	0.0150076	1.974	-0.0298088
90S-5ETS	Sas10	70 kDa	0	3	10	3	4	0	0.0428571	0.142857	0.0428571	0.001	0.0103175	0.0271399	0.00797546	3.36702	-1.76677
90S-5ETS	Fcf2	26 kDa	0	0	2	10	3	0	0	0.0769231	0.384615	0.001	0.001	0.0146138	0.0715746	0	2.29212
90S-5ETS	Bud21	24 kDa	0	0	4	0	1	0	0	0.166667	0	0.001	0.001	0.0316632	0.001	0	-4.98473
90S-C	Krr1	37 kDa	21	23	45	34	30.75	0.567568	0.621622	1.21622	0.918919	0.156511	0.14965	0.231056	0.171005	-0.0646757	-0.434199
90S-C	Utp22	140 kDa	17	7	53	24	25.25	0.121429	0.05	0.378571	0.171429	0.0334848	0.012037	0.0719207	0.0319018	-1.47603	-1.17277
90S-C	Rrp5	193 kDa	14	7	62	25	27	0.0725389	0.0362694	0.321244	0.129534	0.0200031	0.00873153	0.0610296	0.0241054	-1.19592	-1.34015
90S-C=	Kri1	69 kDa	4	4	12	2	5.5	0.057971	0.057971	0.173913	0.0289855	0.0159859	0.013956	0.0330398	0.00539403	-0.19592	-2.61477
90S-C=	Mrd1	101 kDa	0	0	17	3	5	0	0	0.168317	0.029703	0.001	0.001	0.0319767	0.00552755	0	-2.53231
90S-C=	Utp23	29 kDa	0	0	4	0	1	0	0	0.137931	0	0.001	0.001	0.026204	0.001	0	-4.71172
90S-C= HACA	Gar1	21 kDa	1	2	2	3	2	0.047619	0.0952381	0.0952381	0.142857	0.0131313	0.0229277	0.0180932	0.0265849	0.80408	0.555154
90S-C= HACA	Cbf5	55 kDa	0	0	8	8	4	0	0	0.145455	0.145455	0.001	0.001	0.0276333	0.0270682	0	-0.0298088
90S-Helicase	Has1	57 kDa	0	4	10	6	5	0	0.0701754	0.175439	0.105263	0.001	0.0168941	0.0333297	0.0195888	4.07845	-0.766774
90S-Helicase	Prp43	88 kDa	0	0	18	6	6	0	0	0.204545	0.0681818	0.001	0.001	0.0388594	0.0126882	0	-1.61477
90S-Helicase	Ecm16	145 kDa	0	0	4	1	1.25	0	0	0.0275862	0.00689655	0.001	0.001	0.0052408	0.00128341	0	-2.02981
90S-Late	Bms1	136 kDa	23	69	28	52	43	0.169118	0.507353	0.205882	0.382353	0.0466355	0.122141	0.0391133	0.0711536	1.38904	0.863276
90S-Late	Rcl1	40 kDa	6	26	15	17	16	0.15	0.65	0.375	0.425	0.0413636	0.156481	0.0712422	0.07909	1.91956	0.150763
90S-Late	Utp30	32 kDa	2	3	7	9	5.25	0.0625	0.09375	0.21875	0.28125	0.0172348	0.0225694	0.0415579	0.052339	0.389042	0.332761
90S-Late	Kre33	119 kDa	6	1	27	5	9.75	0.0504202	0.00840336	0.226891	0.0420168	0.0139037	0.00202303	0.0431045	0.00781908	-2.78088	-2.46277
90S-Late	Nop14	94 kDa	1	6	12	1	5	0.0106383	0.0638298	0.12766	0.0106383	0.00293359	0.0153664	0.0242527	0.00197972	2.38904	-3.61477
90S-Late	Utp14	103 kDa	5	4	10	8	6.75	0.0485437	0.038835	0.0970874	0.0776699	0.0133863	0.00934915	0.0184446	0.0144539	-0.517848	-0.351737
90S-Late	Noc4	64 kDa	1	1	6	1	2.25	0.015625	0.015625	0.09375	0.015625	0.00430871	0.00376157	0.0178105	0.00290772	-0.19592	-2.61477
90S-Late	Utp20	288 kDa	0	0	12	1	3.25	0	0	0.0416667	0.00347222	0.001	0.001	0.0079158	0.00064616	0	-3.61477
90S-MPP10	Mpp10	67 kDa	0	2	17	1	5	0	0.0298507	0.253731	0.0149254	0.001	0.00718629	0.0482037	0.00277752	2.84525	-4.11727
90S-MPP10	Imp4	33 kDa	0	0	6	0	1.5	0	0	0.181818	0	0.001	0.001	0.0345417	0.001	0	-5.11027
90S-U3	Nop1	34 kDa	9	17	27	24	19.25	0.264706	0.5	0.794118	0.705882	0.0729947	0.12037	0.150866	0.131361	0.721618	-0.199734
90S-U3	Nop56	57 kDa	3	5	31	11	12.5	0.0526316	0.0877193	0.54386	0.192982	0.0145136	0.0211176	0.103322	0.0359129	0.541045	-1.52457
90S-U3	Nop58	57 kDa	3	4	18	9	8.5	0.0526316	0.0701754	0.315789	0.157895	0.0145136	0.0168941	0.0599934	0.0293833	0.219117	-1.02981
90S-U3	Snu13	14 kDa	4	1	11	4	5	0.285714	0.0714286	0.785714	0.285714	0.0787879	0.0171958	0.149269	0.0531697	-2.19592	-1.48924
90S-U3	Rrp9	65 kDa	0	0	3	0	0.75	0	0	0.0461538	0	0.001	0.001	0.00876827	0.001	0	-3.13229
90S-UTPA	Utp10	200 kDa	7	0	36	2	11.25	0.035	0	0.18	0.01	0.00965152	0.001	0.0341962	0.00186094	-3.27076	-4.19973
90S-UTPA	Utp8	80 kDa	0	0	12	2	3.5	0	0	0.15	0.025	0.001	0.001	0.0284969	0.00465235	0	-2.61477
90S-UTPA	Utp9	65 kDa	3	0	10	1	3.5	0.0461538	0	0.153846	0.0153846	0.0127273	0.001	0.0292276	0.00286299	-3.66985	-3.35174
90S-UTPA	Utp15	58 kDa	1	0	13	0	3.5	0.0172414	0	0.224138	0	0.00475444	0.001	0.0425815	0.001	-2.24928	-5.41216
90S-UTPA	Nan1	101 kDa	0	0	12	0	3	0	0	0.118812	0	0.001	0.001	0.0225718	0.001	0	-4.49645
90S-UTPA	Utp4	88 kDa	0	0	9	1	2.5	0	0	0.102273	0.0113636	0.001	0.001	0.0194297	0.00211471	0	-3.19973
90S-UTPA	Utp5	72 kDa	0	0	6	1	1.75	0	0	0.0833333	0.0138889	0.001	0.001	0.0158316	0.00258464	0	-2.61477
90S-UTPB	Pwp2	104 kDa	4	1	14	0	4.75	0.0384615	0.00961538	0.134615	0	0.0106061	0.00231481	0.0255741	0.001	-2.19592	-4.67661
90S-UTPB	Utp21	105 kDa	2	0	7	3	3	0.0190476	0	0.0666667	0.0285714	0.00525253	0.001	0.0126653	0.00531697	-2.39301	-1.2522
90S-UTPB	Utp13	91 kDa	1	0	14	2	4.25	0.010989	0	0.153846	0.021978	0.0030303	0.001	0.0292276	0.00408998	-1.59946	-2.83716
90S-UTPB	Dip2	106 kDa	3	0	9	1	3.25	0.0283019	0	0.0849057	0.00943396	0.00780446	0.001	0.0161303	0.0017556	-2.9643	-3.19973	Average All SSU Processome log2FC
90S-UTPB	Utp6	52 kDa	0	0	10	1	2.75	0	0	0.192308	0.0192308	0.001	0.001	0.0365344	0.00357873	0	-3.35174	Exp 1	Exp2
	All SSU Processome		3.97917	5.02083	14.875	7.14583	7.75521					0.0185539	0.0210448	0.043477	0.0246983			-0.106783	-1.93896
90S/pre-40S	Enp1	55 kDa	312	360	495	488	413.75	5.67273	6.54545	9	8.87273	1.5643	1.57576	1.70981	1.65116	0.0105307	-0.0503562
90S/pre-40S	Rrp12	138 kDa	153	127	183	78	135.25	1.1087	0.92029	1.32609	0.565217	0.305731	0.221551	0.251929	0.105184	-0.464623	-1.26011
90S/pre-40S	Pno1	30 kDa	148	183	289	257	219.25	4.93333	6.1	9.63333	8.56667	1.3604	1.46852	1.83013	1.59421	0.110326	-0.19911
90S/pre-40S	Bud23	31 kDa	16	36	11	26	22.25	0.516129	1.16129	0.354839	0.83871	0.142326	0.27957	0.0674119	0.156079	0.974005	1.2112
90S/pre-40S	Dim1	36 kDa	224	119	362	131	209	6.22222	3.30556	10.0556	3.63889	1.71582	0.795782	1.91035	0.677176	-1.10846	-1.49623
90S/pre-40S	Slx9	24 kDa	42	25	38	18	30.75	1.75	1.04167	1.58333	0.75	0.482576	0.250772	0.3008	0.139571	-0.944381	-1.10781
90S/pre-40S	Trm112	15 kDa	9	22	7	20	14.5	0.6	1.46667	0.466667	1.33333	0.165455	0.353086	0.0886569	0.248125	1.09359	1.48476
pre-40S	Nob1	52 kDa	172	140	233	163	177	3.30769	2.69231	4.48077	3.13462	0.912121	0.648148	0.851253	0.583333	-0.492902	-0.545267
pre-40S	Tsr1	91 kDa	330	378	479	489	419	3.62637	4.15385	5.26374	5.37363	1	1	1	1	0	0
pre-40S	Ltv1	53 kDa	228	264	287	282	265.25	4.30189	4.98113	5.41509	5.32075	1.18628	1.19916	1.02875	0.990161	0.0155839	-0.0551644
pre-40S	Hrr25	57 kDa	224	281	331	344	295	3.92982	4.92982	5.80702	6.03509	1.08368	1.18681	1.10321	1.12309	0.131151	0.0257685
pre-40S	Rio2	49 kDa	303	118	437	94	238	6.18367	2.40816	8.91837	1.91837	1.70519	0.579743	1.6943	0.356997	-1.55645	-2.24671
pre-40S	Rio1	56 kDa	6	45	10	37	24.5	0.107143	0.803571	0.178571	0.660714	0.0295455	0.193452	0.0339248	0.122955	2.71097	1.85772
LSU RP (A)	Rpl4A	39 kDa	31	38	40	37	36.5	0.794872	0.974359	1.02564	0.948718	0.219192	0.234568	0.19485	0.176551	0.097811	-0.142284
LSU RP (A)	Rpl3	44 kDa	18	31	29	40	29.5	0.409091	0.704545	0.659091	0.909091	0.11281	0.169613	0.125214	0.169176	0.588351	0.434138
LSU RP (A)	Rpp0	34 kDa	18	17	23	23	20.25	0.529412	0.5	0.676471	0.676471	0.145989	0.12037	0.128515	0.125887	-0.278382	-0.0298088
LSU RP (A)	Rpl23A	14 kDa	18	19	14	17	17	1.28571	1.35714	1	1.21429	0.354545	0.32672	0.189979	0.225971	-0.117918	0.250299
LSU RP (A)	Rpl16A	22 kDa	13	17	13	18	15.25	0.590909	0.772727	0.590909	0.818182	0.162948	0.186027	0.11226	0.152259	0.191103	0.439676
LSU RP (A)	Rpl30	11 kDa	14	14	17	16	15.25	1.27273	1.27273	1.54545	1.45455	0.350964	0.306397	0.293604	0.270682	-0.19592	-0.117272
LSU RP (A)	Rpl17A	21 kDa	10	16	0	0	6.5	0.47619	0.761905	0	0	0.131313	0.183422	0.001	0.001	0.482152	0
LSU RP (A)	Rpl12A	18 kDa	14	13	15	18	15	0.777778	0.722222	0.833333	1	0.214478	0.173868	0.158316	0.186094	-0.302835	0.233226
LSU RP (A)	Rpl6A	20 kDa	10	14	17	20	15.25	0.5	0.7	0.85	1	0.137879	0.168519	0.161482	0.186094	0.289507	0.204656
LSU RP (A)	Rpl5	34 kDa	7	9	13	8	9.25	0.205882	0.264706	0.382353	0.235294	0.0567736	0.0637255	0.0726391	0.0437868	0.16665	-0.730249
LSU RP (A)	Rpl9A	22 kDa	2	8	9	10	7.25	0.0909091	0.363636	0.409091	0.454545	0.0250689	0.0875421	0.0777187	0.0845882	1.80408	0.122194
LSU RP (A)	Rpl21A	18 kDa	5	15	9	12	10.25	0.277778	0.833333	0.5	0.666667	0.0765993	0.200617	0.0949896	0.124063	1.38904	0.385229
LSU RP (A)	Rpl1A	24 kDa	5	12	10	10	9.25	0.208333	0.5	0.416667	0.416667	0.0574495	0.12037	0.079158	0.0775392	1.06711	-0.0298088
LSU RP (A)	Rpl25	16 kDa	7	12	9	10	9.5	0.4375	0.75	0.5625	0.625	0.120644	0.180556	0.106863	0.116309	0.581687	0.122194
LSU RP (A)	Rpl14A	15 kDa	8	7	10	11	9	0.533333	0.466667	0.666667	0.733333	0.147071	0.112346	0.126653	0.136469	-0.388565	0.107695
LSU RP (A)	Rpl15A	24 kDa	7	13	15	11	11.5	0.291667	0.541667	0.625	0.458333	0.0804293	0.130401	0.118737	0.0852931	0.697165	-0.477268
LSU RP (A)	Rpl10	25 kDa	3	14	9	15	10.25	0.12	0.56	0.36	0.6	0.0330909	0.134815	0.0683925	0.111656	2.02647	0.707157
LSU RP (A)	Rpl24A	18 kDa	4	7	4	12	6.75	0.222222	0.388889	0.222222	0.666667	0.0612795	0.0936214	0.0422176	0.124063	0.611435	1.55515
LSU RP (A)	Rpl31A	13 kDa	5	9	0	0	3.5	0.384615	0.692308	0	0	0.106061	0.166667	0.001	0.001	0.652077	0
LSU RP (A)	Rpl18A	21 kDa	6	7	10	8	7.75	0.285714	0.333333	0.47619	0.380952	0.0787879	0.0802469	0.0904662	0.070893	0.0264722	-0.351737
LSU RP (A)	Rpl22A	14 kDa	3	4	3	0	2.5	0.214286	0.285714	0.214286	0	0.0590909	0.0687831	0.0407098	0.001	0.219117	-5.3473
LSU RP (A)	Rpl28	17 kDa	5	8	6	11	7.5	0.294118	0.470588	0.352941	0.647059	0.0811052	0.11329	0.0670515	0.120414	0.482152	0.84466
LSU RP (A)	Rpp2A	11 kDa	5	4	8	6	5.75	0.454545	0.363636	0.727273	0.545455	0.125344	0.0875421	0.138167	0.101506	-0.517848	-0.444846
LSU RP (A)	Rpl38	9 kDa	7	4	2	4	4.25	0.777778	0.444444	0.222222	0.444444	0.214478	0.106996	0.0422176	0.0827085	-1.00328	0.970191
LSU RP (A)	Rpl11A	20 kDa	0	0	14	16	7.5	0	0	0.7	0.8	0.001	0.001	0.132985	0.148875	0	0.162836
LSU RP (A)	Rpl36A	11 kDa	0	0	9	15	6	0	0	0.818182	1.36364	0.001	0.001	0.155437	0.253765	0	0.707157
LSU RP (A)	Rpl33A	12 kDa	0	0	8	7	3.75	0	0	0.666667	0.583333	0.001	0.001	0.126653	0.108555	0	-0.222454
LSU RP (B)	Rpl20B	20 kDa	33	27	30	34	31	1.65	1.35	1.5	1.7	0.455	0.325	0.284969	0.31636	-0.485427	0.150763
LSU RP (B)	Rpl7B	28 kDa	27	30	36	39	33	0.964286	1.07143	1.28571	1.39286	0.265909	0.257937	0.244259	0.259202	-0.0439171	0.0856684
LSU RP (B)	Rpl8B	28 kDa	18	21	26	30	23.75	0.642857	0.75	0.928571	1.07143	0.177273	0.180556	0.176409	0.199387	0.0264722	0.176642
LSU RP (B)	Rpl13B	23 kDa	13	16	13	20	15.5	0.565217	0.695652	0.565217	0.869565	0.155863	0.167472	0.10738	0.161821	0.10364	0.59168
LSU RP (B)	Rpl2B	27 kDa	11	13	14	14	13	0.407407	0.481481	0.518519	0.518519	0.112346	0.115912	0.0985077	0.0964932	0.0450879	-0.0298088
LSU RP (B)	Rpl16B	22 kDa	9	16	11	21	14.25	0.409091	0.727273	0.5	0.954545	0.11281	0.175084	0.0949896	0.177635	0.634155	0.903077
LSU RP (B)	Rpl36B	11 kDa	12	17	0	0	7.25	1.09091	1.54545	0	0	0.300826	0.372054	0.001	0.001	0.30658	0
LSU RP (B)	Rpl19B	22 kDa	6	17	10	19	13	0.272727	0.772727	0.454545	0.863636	0.0752066	0.186027	0.0863541	0.160718	1.30658	0.896191
LSU RP (B)	Rpl6B	20 kDa	10	13	15	16	13.5	0.5	0.65	0.75	0.8	0.137879	0.156481	0.142484	0.148875	0.182591	0.0633006
LSU RP (B)	Rpl11B	20 kDa	7	12	0	0	4.75	0.35	0.6	0	0	0.0965152	0.144444	0.001	0.001	0.581687	0
LSU RP (B)	Rpl35B	14 kDa	3	13	12	14	10.5	0.214286	0.928571	0.857143	1	0.0590909	0.223545	0.162839	0.186094	1.91956	0.192584
LSU RP (B)	Rpl27B	16 kDa	8	14	12	10	11	0.5	0.875	0.75	0.625	0.137879	0.210648	0.142484	0.116309	0.611435	-0.292843
LSU RP (B)	Rpp2B	11 kDa	8	5	10	6	7.25	0.727273	0.454545	0.909091	0.545455	0.200551	0.109428	0.172708	0.101506	-0.873992	-0.766774
LSU RP (B)	Rpl26B	14 kDa	6	7	8	11	8	0.428571	0.5	0.571429	0.785714	0.118182	0.12037	0.108559	0.146217	0.0264722	0.429623
LSU RP (B)	Rpl43B	10 kDa	3	4	0	0	1.75	0.3	0.4	0	0	0.0827273	0.0962963	0.001	0.001	0.219117	0
LSU RP (B)	Rpl17B	21 kDa	0	0	13	15	7	0	0	0.619048	0.714286	0.001	0.001	0.117606	0.132924	0	0.176642
LSU RP (B)	Rpl31B	13 kDa	0	0	17	16	8.25	0	0	1.30769	1.23077	0.001	0.001	0.248434	0.229039	0	-0.117272
pre-60S	Nop12	52 kDa	39	69	57	72	59.25	0.75	1.32692	1.09615	1.38462	0.206818	0.319444	0.208246	0.257669	0.627202	0.307226
pre-60S	Dbp2	61 kDa	16	72	16	82	46.5	0.262295	1.18033	0.262295	1.34426	0.0723299	0.284153	0.0498306	0.250159	1.974	2.32774
pre-60S	Mex67	67 kDa	29	6	25	5	16.25	0.432836	0.0895522	0.373134	0.0746269	0.119358	0.0215589	0.0708877	0.0138876	-2.46894	-2.35174
pre-60S	Drs1	85 kDa	12	5	4	2	5.75	0.141176	0.0588235	0.0470588	0.0235294	0.0389305	0.0141612	0.00894019	0.00437868	-1.45895	-1.02981
pre-60S	Nug1	58 kDa	0	8	3	16	6.75	0	0.137931	0.0517241	0.275862	0.001	0.0332056	0.00982651	0.0513363	5.05336	2.38523
pre-60S	Dbp9	68 kDa	4	7	5	5	5.25	0.0588235	0.102941	0.0735294	0.0735294	0.016221	0.0247821	0.0139691	0.0136834	0.611435	-0.0298088
pre-60S	Nop4	78 kDa	1	2	3	3	2.25	0.0128205	0.025641	0.0384615	0.0384615	0.00353535	0.00617284	0.00730689	0.00715746	0.80408	-0.0298088
pre-60S	Rat1	116 kDa	1	3	0	7	2.75	0.00862069	0.0258621	0	0.0603448	0.00237722	0.00622605	0.001	0.0112298	1.38904	3.48926
pre-60S	Rex4	33 kDa	0	6	4	5	3.75	0	0.181818	0.121212	0.151515	0.001	0.043771	0.0230278	0.0281961	5.4519	0.292119
pre-60S	Nog1	74 kDa	0	1	2	4	1.75	0	0.0135135	0.027027	0.0540541	0.001	0.00325325	0.00513457	0.0100591	1.70188	0.970191
pre-60S	Ebp2	50 kDa	4	2	3	2	2.75	0.08	0.04	0.06	0.04	0.0220606	0.00962963	0.0113987	0.00744376	-1.19592	-0.614771
pre-60S	Tif6	26 kDa	3	0	2	0	1.25	0.115385	0	0.0769231	0	0.0318182	0.001	0.0146138	0.001	-4.99178	-3.86926
pre-60S	Rpf1	35 kDa	0	4	0	0	1	0	0.114286	0	0	0.001	0.0275132	0.001	0.001	4.78205	0
pre-60S	Brx1	34 kDa	0	0	8	6	3.5	0	0	0.235294	0.176471	0.001	0.001	0.044701	0.0328401	0	-0.444846
pre-60S	Mdn1	559 kDa	0	0	10	9	4.75	0	0	0.0178891	0.0161002	0.001	0.001	0.00339855	0.00299615	0	-0.181812
pre-60S	Noc2	82 kDa	0	0	4	2	1.5	0	0	0.0487805	0.0243902	0.001	0.001	0.00926727	0.00453888	0	-1.02981
pre-60S	Nop7	70 kDa	0	0	3	4	1.75	0	0	0.0428571	0.0571429	0.001	0.001	0.00814196	0.0106339	0	0.385229
pre-60S	Arx1	65 kDa	0	0	0	2	0.5	0	0	0	0.0307692	0.001	0.001	0.001	0.00572597	0	2.51752
pre-60S	Rrp17	28 kDa	0	0	0	4	1	0	0	0	0.142857	0.001	0.001	0.001	0.0265849	0	4.73253	Average All 60S-related log2FC
pre-60S	Pwp1	64 kDa	0	0	4	1	1.25	0	0	0.0625	0.015625	0.001	0.001	0.0118737	0.00290772	0	-2.02981	Exp 1	Exp2
	All 60S-related		7.9375	11.2812	10.875	13.2969	10.8477					0.0964203	0.113518	0.0881691	0.101019			0.396985	0.118883
SSU RP (A)	Rps3	27 kDa	149	168	232	216	191.25	5.51852	6.22222	8.59259	8	1.52177	1.49794	1.63241	1.48875	-0.0227713	-0.132902
SSU RP (A)	Rps1A	29 kDa	143	161	249	232	196.25	4.93103	5.55172	8.58621	8	1.35977	1.33653	1.6312	1.48875	-0.0248747	-0.13183
SSU RP (A)	Rps4A	29 kDa	118	144	191	194	161.75	4.06897	4.96552	6.58621	6.68966	1.12205	1.1954	1.25124	1.24491	0.0913617	-0.0073248
SSU RP (A)	Rps18A	17 kDa	130	129	193	177	157.25	7.64706	7.58824	11.3529	10.4118	2.10873	1.8268	2.15682	1.93757	-0.207061	-0.15466
SSU RP (A)	Rps0A	28 kDa	125	106	186	186	150.75	4.46429	3.78571	6.64286	6.64286	1.23106	0.911376	1.262	1.2362	-0.433784	-0.0298088
SSU RP (A)	Asc1	35 kDa	86	112	152	147	124.25	2.45714	3.2	4.34286	4.2	0.677576	0.77037	0.825052	0.781595	0.18517	-0.078064
SSU RP (A)	Rps5	25 kDa	95	104	145	128	118	3.8	4.16	5.8	5.12	1.04788	1.00148	1.10188	0.952802	-0.0653361	-0.209718
SSU RP (A)	Rps13	17 kDa	87	95	124	109	103.75	5.11765	5.58824	7.29412	6.41176	1.41123	1.34532	1.38573	1.19319	-0.0690081	-0.215821
SSU RP (A)	Rps12	15 kDa	77	88	123	97	96.25	5.13333	5.86667	8.2	6.46667	1.41556	1.41235	1.55783	1.20341	-0.00327513	-0.37241
SSU RP (A)	Rps2	27 kDa	65	75	114	99	88.25	2.40741	2.77778	4.22222	3.66667	0.663861	0.668724	0.802134	0.682345	0.0105307	-0.233342
SSU RP (A)	Rps7A	22 kDa	73	80	167	180	125	3.31818	3.63636	7.59091	8.18182	0.915014	0.875421	1.44211	1.52259	-0.0638167	0.07834
SSU RP (A)	Rps17A	16 kDa	72	85	109	120	96.5	4.5	5.3125	6.8125	7.5	1.24091	1.27894	1.29423	1.39571	0.0435457	0.108897
SSU RP (A)	Rps24A	15 kDa	61	74	112	105	88	4.06667	4.93333	7.46667	7	1.12141	1.18765	1.41851	1.30266	0.0827958	-0.122918
SSU RP (A)	Rps9A	22 kDa	71	72	130	131	101	3.22727	3.27273	5.90909	5.95455	0.889945	0.787879	1.1226	1.10811	-0.175742	-0.0187536
SSU RP (A)	Rps15	16 kDa	63	80	97	94	83.5	3.9375	5	6.0625	5.875	1.0858	1.2037	1.15175	1.0933	0.148728	-0.0751328
SSU RP (A)	Rps20	14 kDa	57	61	94	104	79	4.07143	4.35714	6.71429	7.42857	1.12273	1.04894	1.27557	1.38241	-0.0980729	0.116042
SSU RP (A)	Rps25A	12 kDa	35	35	45	38	38.25	2.91667	2.91667	3.75	3.16667	0.804293	0.70216	0.712422	0.589298	-0.19592	-0.273734
SSU RP (A)	Rps28A	8 kDa	25	37	47	53	40.5	3.125	4.625	5.875	6.625	0.861742	1.11343	1.11613	1.23287	0.369677	0.143523
SSU RP (A)	Rps29A	7 kDa	29	38	30	37	33.5	4.14286	5.42857	4.28571	5.28571	1.14242	1.30688	0.814196	0.98364	0.194026	0.272754
SSU RP (A)	Rps31	17 kDa	27	30	34	19	27.5	1.58824	1.76471	2	1.11765	0.437968	0.424837	0.379958	0.207987	-0.0439171	-0.869344
SSU RP (A)	Rps27A	9 kDa	21	19	0	0	10	2.33333	2.11111	0	0	0.643434	0.50823	0.001	0.001	-0.34031	0
SSU RP (A)	Rps10A	13 kDa	14	7	12	10	10.75	1.07692	0.538462	0.923077	0.769231	0.29697	0.12963	0.175365	0.143149	-1.19592	-0.292843
SSU RP (A)	Rps19A	16 kDa	0	0	146	146	73	0	0	9.125	9.125	0.001	0.001	1.73356	1.69811	0	-0.0298088
SSU RP (A)	Rps21A	10 kDa	0	0	78	81	39.75	0	0	7.8	8.1	0.001	0.001	1.48184	1.50736	0	0.024639
SSU RP (B)	Rps1B	29 kDa	145	167	249	235	199	5	5.75862	8.58621	8.10345	1.37879	1.38633	1.6312	1.508	0.00787499	-0.113294
SSU RP (B)	Rps14B	15 kDa	123	120	155	148	136.5	8.2	8	10.3333	9.86667	2.26121	1.92593	1.96312	1.83613	-0.231544	-0.0964798
SSU RP (B)	Rps19B	16 kDa	101	104	0	0	51.25	6.3125	6.5	0	0	1.74072	1.56481	0.001	0.001	-0.153692	0
SSU RP (B)	Rps6B	27 kDa	89	104	136	125	113.5	3.2963	3.85185	5.03704	4.62963	0.908979	0.927298	0.956932	0.861547	0.0287861	-0.151487
SSU RP (B)	Rps9B	22 kDa	86	98	174	175	133.25	3.90909	4.45455	7.90909	7.95455	1.07796	1.07239	1.50256	1.48029	-0.00747512	-0.0215412
SSU RP (B)	Rps16B	16 kDa	80	94	132	125	107.75	5	5.875	8.25	7.8125	1.37879	1.41435	1.56733	1.45386	0.0367405	-0.108419
SSU RP (B)	Rps22B	15 kDa	59	72	127	103	90.25	3.93333	4.8	8.46667	6.86667	1.08465	1.15556	1.60849	1.27785	0.0913617	-0.331993
SSU RP (B)	Rps7B	22 kDa	88	72	140	125	106.25	4	3.27273	6.36364	5.68182	1.10303	0.787879	1.20896	1.05735	-0.485427	-0.193308
SSU RP (B)	Rps11B	18 kDa	60	62	85	77	71	3.33333	3.44444	4.72222	4.27778	0.919192	0.829218	0.897124	0.796069	-0.148614	-0.172413
SSU RP (B)	Rps8B	22 kDa	55	63	101	88	76.75	2.5	2.86364	4.59091	4	0.689394	0.689394	0.872177	0.744376	-2.09296e-12	-0.228589
SSU RP (B)	Rps21B	10 kDa	40	50	0	0	22.5	4	5	0	0	1.10303	1.2037	0.001	0.001	0.126008	0
SSU RP (B)	Rps29B	7 kDa	20	22	16	19	19.25	2.85714	3.14286	2.28571	2.71429	0.787879	0.756614	0.434238	0.505112	-0.0584167	0.218119
SSU RP (B)	Rps30B	7 kDa	14	20	23	23	20	2	2.85714	3.28571	3.28571	0.551515	0.687831	0.624217	0.611452	0.318653	-0.0298088
SSU RP (B)	Rps23B	16 kDa	17	17	33	35	25.5	1.0625	1.0625	2.0625	2.1875	0.292992	0.255787	0.391832	0.407081	-0.19592	0.0550801
SSU RP (B)	Rps26B	13 kDa	9	8	12	9	9.5	0.692308	0.615385	0.923077	0.692308	0.190909	0.148148	0.175365	0.128834	-0.365845	-0.444846
SSU RP (B)	Rps27B	9 kDa	0	0	31	32	15.75	0	0	3.44444	3.55556	0.001	0.001	0.654373	0.661668	0	0.0159949	Average All 40S RPs log2FC
SSU RP (B)	Rps0B	28 kDa	120	102	185	180	146.75	4.28571	3.64286	6.60714	6.42857	1.18182	0.876984	1.25522	1.19632	-0.430385	-0.0693372	Exp 1	Exp2
	All 40S RPs		66.561	72.561	107.537	102.488	87.2866					0.970146	0.932176	1.06026	0.997699			-0.0800456	-0.101867
Others	Dis3	114 kDa	0	0	2	1	0.75	0	0	0.0175439	0.00877193	0.001	0.001	0.00333297	0.0016324	0	-1.02981
Others	Trf5	74 kDa	0	0	3	0	0.75	0	0	0.0405405	0	0.001	0.001	0.00770186	0.001	0	-2.94521
Others	Ssb2	67 kDa	76	100	115	110	100.25	1.13433	1.49254	1.71642	1.64179	0.3128	0.359315	0.326084	0.305528	0.200008	-0.0939391
Others	Ssa1	70 kDa	65	100	120	109	98.5	0.928571	1.42857	1.71429	1.55714	0.256061	0.343915	0.325678	0.289775	0.425568	-0.168515
Others	Ssb1	67 kDa	72	95	115	106	97	1.07463	1.41791	1.71642	1.58209	0.296336	0.341349	0.326084	0.294417	0.20401	-0.147378
Others	Ssa2	69 kDa	70	93	122	111	99	1.01449	1.34783	1.76812	1.6087	0.279754	0.324477	0.335905	0.299369	0.213956	-0.16613
Others	TY1B-ER1	199 kDa	52	33	0	0	21.25	0.261307	0.165829	0	0	0.0720573	0.0399218	0.001	0.001	-0.851966	0
Others	YGR054W	71 kDa	36	41	63	55	48.75	0.507042	0.577465	0.887324	0.774648	0.139821	0.139019	0.168573	0.144157	-0.00829321	-0.225729
Others	Otu2	36 kDa	38	45	31	34	37	1.05556	1.25	0.861111	0.944444	0.291077	0.300926	0.163593	0.175756	0.0480054	0.103458
Others	Pus4	45 kDa	36	39	33	35	35.75	0.8	0.866667	0.733333	0.777778	0.220606	0.208642	0.139318	0.14474	-0.080443	0.0550801
Others	Sro9	48 kDa	25	18	38	28	27.25	0.520833	0.375	0.791667	0.583333	0.143624	0.0902778	0.1504	0.108555	-0.669851	-0.470381
Others	Tma64	64 kDa	5	43	19	37	26	0.078125	0.671875	0.296875	0.578125	0.0215436	0.161748	0.0564001	0.107586	2.90842	0.931717
Others	Yra1	25 kDa	10	25	14	22	17.75	0.4	1	0.56	0.88	0.110303	0.240741	0.106388	0.163763	1.12601	0.622268
Others	Tef1	50 kDa	13	17	20	17	16.75	0.26	0.34	0.4	0.34	0.071697	0.0818519	0.0759916	0.063272	0.191103	-0.264274
Others	Pab1	64 kDa	19	35	34	43	32.75	0.296875	0.546875	0.53125	0.671875	0.0818655	0.131655	0.100926	0.125032	0.685435	0.308993
Others	Sui3	32 kDa	11	19	24	18	18	0.34375	0.59375	0.75	0.5625	0.0947917	0.14294	0.142484	0.104678	0.592576	-0.444846
Others	Ded1	66 kDa	12	20	10	16	14.5	0.181818	0.30303	0.151515	0.242424	0.0501377	0.0729517	0.0287847	0.0451137	0.541045	0.648263
Others	Pdc1	61 kDa	6	5	13	11	8.75	0.0983607	0.0819672	0.213115	0.180328	0.0271237	0.0197328	0.0404874	0.0335579	-0.458955	-0.270817
Others	Rtt107	123 kDa	3	41	2	47	23.25	0.0243902	0.333333	0.0162602	0.382114	0.00672579	0.0802469	0.00308909	0.0711091	3.57667	4.52478
Others	Imd3	57 kDa	16	9	25	5	13.75	0.280702	0.157895	0.438596	0.0877193	0.0774056	0.0380117	0.0833242	0.016324	-1.026	-2.35174
Others	Sse1	77 kDa	3	15	23	20	15.25	0.038961	0.194805	0.298701	0.25974	0.0107438	0.0468975	0.056747	0.0483361	2.12601	-0.231443
Others	Stm1	30 kDa	10	11	10	11	10.5	0.333333	0.366667	0.333333	0.366667	0.0919192	0.0882716	0.0633264	0.0682345	-0.0584167	0.107695
Others	Tdh3	36 kDa	6	12	12	11	10.25	0.166667	0.333333	0.333333	0.305556	0.0459596	0.0802469	0.0633264	0.0568621	0.80408	-0.15534
Others	Fas1	229 kDa	10	9	10	7	9	0.0436681	0.0393013	0.0436681	0.0305677	0.0120418	0.00946143	0.00829603	0.00568847	-0.347923	-0.544382
Others	Pbp1	79 kDa	4	4	16	22	11.5	0.0506329	0.0506329	0.202532	0.278481	0.0139624	0.0121894	0.0384768	0.0518237	-0.19592	0.429623
Others	Htb2	14 kDa	9	11	8	10	9.5	0.642857	0.785714	0.571429	0.714286	0.177273	0.189153	0.108559	0.132924	0.0935864	0.292119
Others	Hta2	14 kDa	8	11	0	0	4.75	0.571429	0.785714	0	0	0.157576	0.189153	0.001	0.001	0.263511	0
Others	Ssc1	71 kDa	3	11	22	17	13.25	0.0422535	0.15493	0.309859	0.239437	0.0116517	0.0372979	0.0588668	0.0445577	1.67855	-0.401778
Others	Cdc19	55 kDa	12	5	11	12	10	0.218182	0.0909091	0.2	0.218182	0.0601653	0.0218855	0.0379958	0.0406023	-1.45895	0.0957221
Others	Gcd11	58 kDa	6	9	17	15	11.75	0.103448	0.155172	0.293103	0.258621	0.0285266	0.0373563	0.0556835	0.0481278	0.389042	-0.210381
Others	Pbp4	20 kDa	4	7	7	12	7.5	0.2	0.35	0.35	0.6	0.0551515	0.0842593	0.0664927	0.111656	0.611435	0.747799
Others	Htz1	14 kDa	6	11	6	8	7.75	0.428571	0.785714	0.428571	0.571429	0.118182	0.189153	0.0814196	0.106339	0.678549	0.385229
Others	Pgk1	45 kDa	0	1	5	4	2.5	0	0.0222222	0.111111	0.0888889	0.001	0.00534979	0.0211088	0.0165417	2.41948	-0.351737
Others	Fas2	207 kDa	5	3	10	6	6	0.0241546	0.0144928	0.0483092	0.0289855	0.00666081	0.003489	0.00917774	0.00539403	-0.932886	-0.766774
Others	Yef3	116 kDa	7	2	2	4	3.75	0.0603448	0.0172414	0.0172414	0.0344828	0.0166405	0.0041507	0.0032755	0.00641704	-2.00328	0.970191
Others	Mtr2	21 kDa	7	3	6	0	4	0.333333	0.142857	0.285714	0	0.0919192	0.0343915	0.0542797	0.001	-1.41831	-5.76234
Others	Hhf1	11 kDa	3	5	6	4	4.5	0.272727	0.454545	0.545455	0.363636	0.0752066	0.109428	0.103625	0.0676706	0.541045	-0.614771
Others	Adh1	37 kDa	3	1	7	4	3.75	0.0810811	0.027027	0.189189	0.108108	0.0223587	0.00650651	0.035942	0.0201183	-1.78088	-0.837164
Others	Nat1	99 kDa	3	7	12	11	8.25	0.030303	0.0707071	0.121212	0.111111	0.00835629	0.0170221	0.0230278	0.0206771	1.02647	-0.15534
Others	Hsc82	81 kDa	3	3	4	4	3.5	0.037037	0.037037	0.0493827	0.0493827	0.0102132	0.00891632	0.00938169	0.00918983	-0.19592	-0.0298088
Others	Lhp1	32 kDa	3	2	9	3	4.25	0.09375	0.0625	0.28125	0.09375	0.0258523	0.0150463	0.0534316	0.0174463	-0.780883	-1.61477
Others	Eno2	47 kDa	2	4	7	3	4	0.0425532	0.0851064	0.148936	0.0638298	0.0117344	0.0204886	0.0282948	0.0118783	0.80408	-1.2522
Others	Mhp1	155 kDa	3	6	3	2	3.5	0.0193548	0.0387097	0.0193548	0.0129032	0.00533724	0.009319	0.00367702	0.00240121	0.80408	-0.614771
Others	Hsp60	61 kDa	4	6	3	1	3.5	0.0655738	0.0983607	0.0491803	0.0163934	0.0180825	0.0236794	0.00934324	0.00305072	0.389042	-1.61477
Others	Mrx1	80 kDa	1	5	0	0	1.5	0.0125	0.0625	0	0	0.00344697	0.0150463	0.001	0.001	2.12601	0
Others	Tif1	45 kDa	3	0	2	0	1.25	0.0666667	0	0.0444444	0	0.0183838	0.001	0.00844352	0.001	-4.20037	-3.07784
Others	Act1	42 kDa	0	2	0	0	0.5	0	0.047619	0	0	0.001	0.0114638	0.001	0.001	3.51902	0
Others	Mss116	76 kDa	1	4	7	3	3.75	0.0131579	0.0526316	0.0921053	0.0394737	0.00362839	0.0126706	0.0174981	0.00734582	1.80408	-1.2522
Others	Mud2	60 kDa	1	9	0	13	5.75	0.0166667	0.15	0	0.216667	0.00459596	0.0361111	0.001	0.0403204	2.974	5.33344
Others	Her1	139 kDa	2	3	0	0	1.25	0.0143885	0.0215827	0	0	0.00396773	0.00519584	0.001	0.001	0.389042	0
Others	Fun12	112 kDa	0	5	0	0	1.25	0	0.0446429	0	0	0.001	0.0107474	0.001	0.001	3.42591	0
Others	Sui2	35 kDa	2	5	8	8	5.75	0.0571429	0.142857	0.228571	0.228571	0.0157576	0.0343915	0.0434238	0.0425358	1.12601	-0.0298088
Others	Eft1	93 kDa	3	1	5	2	2.75	0.0322581	0.0107527	0.0537634	0.0215054	0.00889541	0.00258861	0.0102139	0.00400202	-1.78088	-1.35174
Others	Xrn1	175 kDa	6	1	11	7	6.25	0.0342857	0.00571429	0.0628571	0.04	0.00945455	0.00137566	0.0119415	0.00744376	-2.78088	-0.681886
Others	Lsm12	21 kDa	0	1	8	7	4	0	0.047619	0.380952	0.333333	0.001	0.0114638	0.072373	0.0620314	3.51902	-0.222454
Others	Fba1	40 kDa	0	2	0	0	0.5	0	0.05	0	0	0.001	0.012037	0.001	0.001	3.58941	0
Others	Air1	42 kDa	0	7	0	5	3	0	0.166667	0	0.119048	0.001	0.0401235	0.001	0.0221541	5.32637	4.4695
Others	YPR117W	286 kDa	3	4	0	0	1.75	0.0104895	0.013986	0	0	0.00289256	0.003367	0.001	0.001	0.219117	0
Others	Rny1	50 kDa	1	1	1	1	1	0.02	0.02	0.02	0.02	0.00551515	0.00481481	0.00379958	0.00372188	-0.19592	-0.0298088
Others	His1	32 kDa	3	1	8	6	4.5	0.09375	0.03125	0.25	0.1875	0.0258523	0.00752315	0.0474948	0.0348926	-1.78088	-0.444846
Others	MRpl22	35 kDa	0	4	2	6	3	0	0.114286	0.0571429	0.171429	0.001	0.0275132	0.0108559	0.0319018	4.78205	1.55515
Others	Mis1	106 kDa	0	1	0	0	0.25	0	0.00943396	0	0	0.001	0.00227114	0.001	0.001	1.18342	0
Others	Coq2	41 kDa	0	4	0	0	1	0	0.097561	0	0	0.001	0.0234869	0.001	0.001	4.55378	0
Others	YGR250C	90 kDa	3	2	0	0	1.25	0.0333333	0.0222222	0	0	0.00919192	0.00534979	0.001	0.001	-0.780883	0
Others	Tea1	87 kDa	1	4	0	0	1.25	0.0114943	0.045977	0	0	0.00316963	0.0110685	0.001	0.001	1.80408	0
Others	Irc5	97 kDa	5	2	4	4	3.75	0.0515464	0.0206186	0.0412371	0.0412371	0.0142143	0.00496373	0.00783419	0.00767398	-1.51785	-0.0298088
Others	Ism1	116 kDa	2	3	8	10	5.75	0.0172414	0.0258621	0.0689655	0.0862069	0.00475444	0.00622605	0.013102	0.0160426	0.389042	0.292119
Others	Sec7	227 kDa	0	1	0	0	0.25	0	0.00440529	0	0	0.001	0.00106053	0.001	0.001	0.084788	0
Others	Gip4	87 kDa	0	6	0	0	1.5	0	0.0689655	0	0	0.001	0.0166028	0.001	0.001	4.05336	0
Others	Sir1	77 kDa	0	0	7	6	3.25	0	0	0.0909091	0.0779221	0.001	0.001	0.0172708	0.0145008	0	-0.252201
Others	Msl5	53 kDa	0	6	1	10	4.25	0	0.113208	0.0188679	0.188679	0.001	0.0272537	0.00358451	0.0351121	4.76838	3.29212
Others	Dyn1	471 kDa	3	0	0	0	0.75	0.00636943	0	0	0	0.00175642	0.001	0.001	0.001	-0.812636	0
Others	Pmc1	131 kDa	2	3	3	2	2.5	0.0152672	0.0229008	0.0229008	0.0152672	0.00421004	0.00551315	0.00435067	0.00284113	0.389042	-0.614771
Others	Hsp104	102 kDa	1	4	0	0	1.25	0.00980392	0.0392157	0	0	0.00270351	0.00944081	0.001	0.001	1.80408	0
Others	Rad18	55 kDa	1	1	0	0	0.5	0.0181818	0.0181818	0	0	0.00501377	0.0043771	0.001	0.001	-0.19592	0
Others	Snf2	194 kDa	4	1	11	2	4.5	0.0206186	0.00515464	0.056701	0.0103093	0.00568572	0.00124093	0.010772	0.0019185	-2.19592	-2.48924
Others	Nop13	46 kDa	0	3	8	8	4.75	0	0.0652174	0.173913	0.173913	0.001	0.0157005	0.0330398	0.0323642	3.97274	-0.0298088
Others	Sen1	253 kDa	4	0	5	5	3.5	0.0158103	0	0.0197628	0.0197628	0.0043598	0.001	0.00375453	0.00367775	-2.12426	-0.0298088
Others	Rod1	92 kDa	0	4	0	0	1	0	0.0434783	0	0	0.001	0.010467	0.001	0.001	3.38777	0
Others	Drs2	154 kDa	0	1	0	0	0.25	0	0.00649351	0	0	0.001	0.00156325	0.001	0.001	0.64455	0
Others	Gpm1	28 kDa	0	1	0	0	0.25	0	0.0357143	0	0	0.001	0.00859788	0.001	0.001	3.10398	0
Others	Pan2	127 kDa	1	4	0	0	1.25	0.00787402	0.0314961	0	0	0.00217132	0.00758239	0.001	0.001	1.80408	0
Others	YHR127W	27 kDa	0	3	2	7	3	0	0.111111	0.0740741	0.259259	0.001	0.026749	0.0140725	0.0482466	4.74141	1.77755
Others	Rai1	45 kDa	0	4	4	11	4.75	0	0.0888889	0.0888889	0.244444	0.001	0.0213992	0.016887	0.0454897	4.41948	1.42962
Others	Net1	129 kDa	1	0	0	0	0.25	0.00775194	0	0	0	0.00213766	0.001	0.001	0.001	-1.09603	0
Others	Yta6	85 kDa	1	2	0	0	0.75	0.0117647	0.0235294	0	0	0.00324421	0.00566449	0.001	0.001	0.80408	0
Others	Ssk2	181 kDa	1	0	0	0	0.25	0.00552486	0	0	0	0.00152352	0.001	0.001	0.001	-0.607411	0
Others	Sgs1	164 kDa	1	2	0	0	0.75	0.00609756	0.0121951	0	0	0.00168145	0.00293586	0.001	0.001	0.80408	0
Others	Cti6	57 kDa	1	0	0	0	0.25	0.0175439	0	0	0	0.00483785	0.001	0.001	0.001	-2.27437	0
Others	Ssk1	79 kDa	2	2	0	0	1	0.0253165	0.0253165	0	0	0.0069812	0.0060947	0.001	0.001	-0.19592	0
Others	Rap1	92 kDa	0	0	6	2	2	0	0	0.0652174	0.0217391	0.001	0.001	0.0123899	0.00404552	0	-1.61477
Others	Pap2	66 kDa	0	4	0	0	1	0	0.0606061	0	0	0.001	0.0145903	0.001	0.001	3.86694	0
Others	Pfk1	108 kDa	2	1	0	0	0.75	0.0185185	0.00925926	0	0	0.00510662	0.00222908	0.001	0.001	-1.19592	0
Others	Thp1	53 kDa	0	1	0	0	0.25	0	0.0188679	0	0	0.001	0.00454228	0.001	0.001	2.18342	0
Others	Itt1	54 kDa	0	1	0	0	0.25	0	0.0185185	0	0	0.001	0.00445816	0.001	0.001	2.15645	0
Others	Prp28	67 kDa	0	2	0	0	0.5	0	0.0298507	0	0	0.001	0.00718629	0.001	0.001	2.84525	0
Others	Ybt1	189 kDa	2	2	0	0	1	0.010582	0.010582	0	0	0.00291807	0.00254752	0.001	0.001	-0.19592	0
Others	Ioc4	55 kDa	0	1	0	0	0.25	0	0.0181818	0	0	0.001	0.0043771	0.001	0.001	2.12998	0
Others	Met30	73 kDa	0	1	0	0	0.25	0	0.0136986	0	0	0.001	0.00329782	0.001	0.001	1.72151	0
Others	YBL086C	52 kDa	0	2	0	0	0.5	0	0.0384615	0	0	0.001	0.00925926	0.001	0.001	3.2109	0
Others	Est2	103 kDa	2	1	0	0	0.75	0.0194175	0.00970874	0	0	0.00535452	0.00233729	0.001	0.001	-1.19592	0
Others	Msc3	81 kDa	2	1	0	0	0.75	0.0246914	0.0123457	0	0	0.00680883	0.00297211	0.001	0.001	-1.19592	0
Others	Mcm3	108 kDa	0	2	0	0	0.5	0	0.0185185	0	0	0.001	0.00445816	0.001	0.001	2.15645	0
Others	Mdm30	71 kDa	2	2	0	0	1	0.028169	0.028169	0	0	0.00776782	0.00678143	0.001	0.001	-0.19592	0
Others	TY1B-ML2	199 kDa	0	0	64	26	22.5	0	0	0.321608	0.130653	0.001	0.001	0.0610988	0.0243138	0	-1.32937
Others	Ura2	245 kDa	0	0	2	5	1.75	0	0	0.00816327	0.0204082	0.001	0.001	0.00155085	0.00379784	0	1.29212
Others	Rqc2	119 kDa	0	0	13	10	5.75	0	0	0.109244	0.0840336	0.001	0.001	0.020754	0.0156382	0	-0.40832
Others	Kar2	74 kDa	0	0	11	8	4.75	0	0	0.148649	0.108108	0.001	0.001	0.0282401	0.0201183	0	-0.48924
Others	Kap123	123 kDa	0	0	5	4	2.25	0	0	0.0406504	0.0325203	0.001	0.001	0.00772273	0.00605184	0	-0.351737
Others	Eno1	47 kDa	0	0	5	2	1.75	0	0	0.106383	0.0425532	0.001	0.001	0.0202105	0.0079189	0	-1.35174
Others	Jem1	75 kDa	0	0	5	3	2	0	0	0.0666667	0.04	0.001	0.001	0.0126653	0.00744376	0	-0.766774
Others	Hsp26	24 kDa	0	0	3	3	1.5	0	0	0.125	0.125	0.001	0.001	0.0237474	0.0232618	0	-0.0298088
Others	Spo75	102 kDa	0	0	4	3	1.75	0	0	0.0392157	0.0294118	0.001	0.001	0.00745016	0.00547335	0	-0.444846
Others	Bem2	245 kDa	0	0	10	6	4	0	0	0.0408163	0.0244898	0.001	0.001	0.00775425	0.00455741	0	-0.766774
Others	Sqs1	87 kDa	0	0	8	4	3	0	0	0.091954	0.045977	0.001	0.001	0.0174693	0.00855605	0	-1.02981
Others	Elp2	89 kDa	0	0	3	2	1.25	0	0	0.0337079	0.0224719	0.001	0.001	0.00640379	0.00418189	0	-0.614771
Others	YDR514C	55 kDa	0	0	2	2	1	0	0	0.0363636	0.0363636	0.001	0.001	0.00690833	0.00676706	0	-0.0298088
Others	Pus7	77 kDa	0	0	3	4	1.75	0	0	0.038961	0.0519481	0.001	0.001	0.00740178	0.00966722	0	0.385229
Others	Esl1	129 kDa	0	0	4	2	1.5	0	0	0.0310078	0.0155039	0.001	0.001	0.00589083	0.00288518	0	-1.02981
Others	Mtc4	79 kDa	0	0	0	1	0.25	0	0	0	0.0126582	0.001	0.001	0.001	0.00235562	0	1.23611
Others	Ira1	351 kDa	0	0	5	6	2.75	0	0	0.014245	0.017094	0.001	0.001	0.00270626	0.0031811	0	0.233226
Others	Myo2	181 kDa	0	0	6	3	2.25	0	0	0.0331492	0.0165746	0.001	0.001	0.00629765	0.00308443	0	-1.02981
Others	Tra1	433 kDa	0	0	8	4	3	0	0	0.0184758	0.00923788	0.001	0.001	0.00351001	0.00171911	0	-1.02981
Others	Pma2	102 kDa	0	0	5	2	1.75	0	0	0.0490196	0.0196078	0.001	0.001	0.0093127	0.0036489	0	-1.35174
Others	Mbr1	37 kDa	0	0	3	2	1.25	0	0	0.0810811	0.0540541	0.001	0.001	0.0154037	0.0100591	0	-0.614771
Others	Sap185	121 kDa	0	0	3	1	1	0	0	0.0247934	0.00826446	0.001	0.001	0.00471023	0.00153797	0	-1.61477
Others	Smc1	141 kDa	0	0	4	4	2	0	0	0.0283688	0.0283688	0.001	0.001	0.00538948	0.00527926	0	-0.0298088
Others	Sec21	105 kDa	0	0	4	1	1.25	0	0	0.0380952	0.00952381	0.001	0.001	0.0072373	0.00177232	0	-2.02981
Others	Gal3	58 kDa	0	0	6	1	1.75	0	0	0.103448	0.0172414	0.001	0.001	0.019653	0.00320852	0	-2.61477
Others	Gde1	138 kDa	0	0	0	6	1.5	0	0	0	0.0434783	0.001	0.001	0.001	0.00809105	0	3.01633
Others	Arp9	53 kDa	0	0	6	0	1.5	0	0	0.113208	0	0.001	0.001	0.0215071	0.001	0	-4.42674
Others	Ard1	28 kDa	0	0	6	0	1.5	0	0	0.214286	0	0.001	0.001	0.0407098	0.001	0	-5.3473
Others	Ape2	108 kDa	0	0	2	3	1.25	0	0	0.0185185	0.0277778	0.001	0.001	0.00351813	0.00516928	0	0.555154
Others	Ire1	127 kDa	0	0	1	2	0.75	0	0	0.00787402	0.015748	0.001	0.001	0.0014959	0.00293062	0	0.970191
Others	Swi3	93 kDa	0	0	4	3	1.75	0	0	0.0430108	0.0322581	0.001	0.001	0.00817115	0.00600303	0	-0.444846
Others	Leu2	39 kDa	0	0	5	2	1.75	0	0	0.128205	0.0512821	0.001	0.001	0.0243563	0.00954329	0	-1.35174
Others	Ydj1	45 kDa	0	0	4	1	1.25	0	0	0.0888889	0.0222222	0.001	0.001	0.016887	0.00413542	0	-2.02981
Others	Rrn10	17 kDa	0	0	0	4	1	0	0	0	0.235294	0.001	0.001	0.001	0.0437868	0	5.45243
Others	Slu7	45 kDa	0	0	5	0	1.25	0	0	0.111111	0	0.001	0.001	0.0211088	0.001	0	-4.39977
Others	Bud3	185 kDa	0	0	2	3	1.25	0	0	0.0108108	0.0162162	0.001	0.001	0.00205383	0.00301774	0	0.555154
Others	Spt5	116 kDa	0	0	3	0	0.75	0	0	0.0258621	0	0.001	0.001	0.00491325	0.001	0	-2.29668
Others	Smc4	162 kDa	0	0	4	2	1.5	0	0	0.0246914	0.0123457	0.001	0.001	0.00469084	0.00229746	0	-1.02981
Others	YOR022C	82 kDa	0	0	3	4	1.75	0	0	0.0365854	0.0487805	0.001	0.001	0.00695046	0.00907776	0	0.385229
Others	Tif4631	107 kDa	0	0	3	2	1.25	0	0	0.0280374	0.0186916	0.001	0.001	0.00532652	0.00347839	0	-0.614771
Others	Pep1	178 kDa	0	0	3	0	0.75	0	0	0.0168539	0	0.001	0.001	0.0032019	0.001	0	-1.67893
Others	Uaf30	26 kDa	0	0	0	5	1.25	0	0	0	0.192308	0.001	0.001	0.001	0.0357873	0	5.16138
Others	Ysp2	161 kDa	0	0	2	0	0.5	0	0	0.0124224	0	0.001	0.001	0.00235999	0.001	0	-1.23878
Others	Zds2	105 kDa	0	0	1	3	1	0	0	0.00952381	0.0285714	0.001	0.001	0.00180932	0.00531697	0	1.55515
Others	Nab2	58 kDa	0	0	2	0	0.5	0	0	0.0344828	0	0.001	0.001	0.006551	0.001	0	-2.71172
Others	Ubp10	89 kDa	0	0	3	1	1	0	0	0.0337079	0.011236	0.001	0.001	0.00640379	0.00209094	0	-1.61477	Average All 40S RPs log2FC
Others	Arp4	55 kDa	0	0	3	1	1	0	0	0.0545455	0.0181818	0.001	0.001	0.0103625	0.00338353	0	-1.61477	Exp 1	Exp2
	All Others		5.02649	7.13245	9.12583	8.42384	7.42715					0.025922	0.0327743	0.0297303	0.0280739			0.532028	-0.241562
